# Supplementary material for: Variables influencing the prediction of fluid responsiveness: a systematic review and meta-analysis
Source: Springer Nature journal article supplement (doi:10.1186/s13054-023-04629-w), 2023-09-20
Supplement: MOESM1 [file 26065760]

# Variables influencing prediction of fluid responsiveness: a systematic review and metanalysis.

## Supplement Material Appendix

Jorge Iván Alvarado Sánchez<sup>1, 2</sup> (ORCID: 0000-0003-4320-3150)

Juan Daniel Caicedo Ruiz<sup>2</sup>

Juan José Diaztagle Fernández<sup>2,3</sup>

Luís Eduardo Cruz Martínez<sup>2</sup>

Fredy Leonardo Carreño<sup>4</sup>

Carlos Andrés Santacruz Herrera<sup>1</sup>

Gustavo Adolfo Ospina-Tascón <sup>5, 6</sup> (ORCID: 0000-0001-9370-3298)

1. Department of Intensive Care, Fundación Santa Fe de Bogotá, Bogotá Colombia.
2. Department of Physiology Sciences, Faculty of Medicine, Universidad Nacional de Colombia, Bogotá, Colombia.
3. Fundación Universitaria de Ciencias de la Salud, Bogotá, Colombia. Department of Internal Medicine, Hospital de San José, Bogotá Colombia.
4. Universidad de Los Andes, Bogotá, Colombia.
5. Department of Intensive Care, Fundación Valle del Lili, Cali, Colombia.
6. Translational Research Laboratory in Critical Care Medicine (TransLab-CCM), Universidad Icesi, Cali, Colombia

Corresponding author: Jorge Iván Alvarado Sánchez: [Jialvarados@unal.edu.co](mailto:Jialvarados@unal.edu.co)

| Study                 | Year | Sample Size | Number of Fluid Challenges | Setting                     | Excitation method | Measurement method to assess excitation method | Peri-excitation macrohemodynamic variable | Method Used to Measure Predictor                  | Predictor Of Fluid Responsiveness evaluated | Type of fluid used      | Definition of Fluid Responsiveness | Fluid Responsiveness Rate |
|-----------------------|------|-------------|----------------------------|-----------------------------|-------------------|------------------------------------------------|-------------------------------------------|---------------------------------------------------|---------------------------------------------|-------------------------|------------------------------------|---------------------------|
| Michard et al (1)     | 2000 | 40          | 40                         | SEPSIS                      | FC (500 ml)       | PAC                                            | CI                                        | Arterial tracing measurement*                     | PPV                                         | Colloid                 | 15%                                | 0.4                       |
| Berkenstadt et al (2) | 2001 | 15          | 140                        | NEUROSURGICAL               | FC (100 ml)       | C-PCA (PICCO)                                  | SV                                        | PCA (PICCO)                                       | SVV                                         | Colloid                 | 5%                                 | 0.5                       |
| Kramer et al (3)      | 2004 | 21          | 21                         | CARDIOVASCULAR              | FC (500 ml)       | PAC                                            | CO                                        | Arterial tracing measurement*                     | PPV                                         | PRBC                    | 12%                                | 0.28                      |
| De Backer et al (4)   | 2005 | 27          | 27                         | SEPSIS                      | FC (500-1000 ml)  | PAC                                            | CI                                        | Arterial tracing measurement*                     | PPV                                         | Crystalloid and Colloid | 15%                                | 0.56                      |
| Feissel et al (5)     | 2005 | 20          | 20                         | SEPSIS                      | FC (8 ml/kg)      | TTE                                            | CI                                        | Arterial tracing measurement*                     | PPV                                         | Colloid                 | 15%                                | 0.65                      |
| Hofer et al (6)       | 2005 | 35          | 35                         | CARDIOVASCULAR              | FC (10 ml/kg)     | TDTP (PICCO)                                   | SVI                                       | PCA (PICCO)                                       | PPV, SVV                                    | Colloid                 | 25%                                | 0.6                       |
| Lafanechere et al (7) | 2006 | 22          | 22                         | SEPSIS                      | FC (500 ml)       | Esophageal doppler                             | ABF                                       | Arterial tracing measurement*/ Esophageal Doppler | PPV, PLR                                    | Crystalloid             | 15%                                | 0.45                      |
| Monnet et al (8)      | 2006 | 71          | 71                         | SEPSIS                      | FC (500 ml)       | Esophageal doppler                             | ABF                                       | Esophageal doppler/Arterial pressure              | PLR                                         | Crystalloid             | 15%                                | 0.54                      |
| Monnet et al (8)      | 2006 | 30          | 30                         | SEPSIS                      | FC (500 ml)       | Esophageal doppler                             | ABF                                       | Arterial tracing measurement*                     | PPV                                         | Crystalloid             | 15%                                | 0.54                      |
| Charron et al (9)     | 2006 | 21          | 21                         | SEPSIS                      | FC (100 ml)       | TEE                                            | SV                                        | Arterial tracing measurement*                     | PPV                                         | Colloid                 | 15%                                | 0.43                      |
| Cannesson et al (10)  | 2007 | 25          | 25                         | CARDIOVASCULAR              | FC (500 ml)       | PAC                                            | CI                                        | Arterial tracing measurement*                     | PPV                                         | Colloid                 | 15%                                | 0.6                       |
| Feissel et al (11)    | 2007 | 23          | 23                         | SEPSIS                      | FC (8 ml/kg)      | TTE                                            | CI                                        | Arterial tracing measurement*                     | PPV                                         | Colloid                 | 15%                                | 0.64                      |
| Wyffels et al (12)    | 2007 | 32          | 32                         | CARDIOVASCULAR              | FC (500 ml)       | C-TD                                           | CI                                        | Arterial tracing measurement*                     | PPV                                         | Colloid                 | 15%                                | 0.625                     |
| Maizel et al (13)     | 2007 | 34          | 34                         | MEDICAL INTENSIVE CARE UNIT | FC (500 ml)       | TTE                                            | CO, SV                                    | TTE                                               | PLR                                         | Crystalloid             | 5%                                 | 0.5                       |
| Lamia et al (14)      | 2007 | 24          | 24                         | SEPSIS                      | FC (500 ml)       | TTE                                            | SVI                                       | TTE                                               | PLR                                         | Crystalloid             | 15%                                | 0.54                      |
| Auler et al (15)      | 2008 | 59          | 59                         | CARDIOVASCULAR              | FC (20 ml/kg)     | PAC                                            | CI                                        | PCA (computer software)                           | PPV                                         | Crystalloid             | 15%                                | 0.66                      |

| Study                | Year | Sample Size | Number of Fluid Challenges | Setting        | Excitation method | Measurement method to assess excitation method       | Peri-excitation macrohemodynamic variable | Method Used to Measure Predictor                      | Predictor Of Fluid Responsiveness evaluated | Type of fluid used      | Definition of Fluid Responsiveness | Fluid Responsiveness Rate |
|----------------------|------|-------------|----------------------------|----------------|-------------------|------------------------------------------------------|-------------------------------------------|-------------------------------------------------------|---------------------------------------------|-------------------------|------------------------------------|---------------------------|
| Cannesson et al (16) | 2008 | 25          | 25                         | CARDIOVASCULAR | FC (500 ml)       | PAC                                                  | CI                                        | Arterial tracing measurement*/PCA (computer software) | PPV                                         | Colloid                 | 15%                                | 0.64                      |
| Huang et al(17)      | 2008 | 22          | 22                         | SEPSIS         | FC (500 ml)       | PAC                                                  | CI                                        | PCA (PiCCO)                                           | PPV                                         | Colloid                 | 15%                                | 0.45                      |
| Derichard et al (18) | 2009 | 11          | 56                         | SURGICAL       | FC (300 ml)       | Esophageal doppler                                   | SVI                                       | Arterial tracing measurement*/PCA (computer software) | PPV                                         | Colloid                 | 10%                                | 0.57                      |
| de Wall et al (19)   | 2009 | 22          | 22                         | CARDIOVASCULAR | FC (10 ml/kg)     | TDTP (PiCCO)                                         | SVI                                       | PCA (PiCCO)                                           | PPV/SVV                                     | Colloid                 | 12%                                | 0.5                       |
| Cannesson et al (20) | 2009 | 25          | 25                         | CARDIOVASCULAR | FC (500 ml)       | PAC                                                  | CI                                        | Arterial tracing measurement*/PCA (Vigileo)           | PPV/SVV                                     | Colloid                 | 15%                                | 0.68                      |
| Monge et al (21)     | 2009 | 38          | 38                         | SEPSIS         | FC (500 ml)       | NC-PCA (Vigileo)                                     | SVI                                       | Arterial tracing measurement*/PCA (Vigileo)           | PPV/SVV                                     | Colloid                 | 15%                                | 0.5                       |
| Vistisen et al (22)  | 2009 | 23          | 23                         | CARDIOVASCULAR | FC (500 ml)       | C-TD                                                 | CI                                        | Arterial tracing measurement*                         | PPV                                         | Colloid                 | 15%                                | 0.73                      |
| Vallee et al (23)    | 2009 | 42          | 42                         | SEPSIS         | FC (6 ml/kg)      | TDTP (PiCCO)                                         | CI                                        | Arterial tracing measurement*                         | PPV                                         | Colloid                 | 15%                                | 0.38                      |
| Lahner et al (24)    | 2009 | 20          | 67                         | SURGICAL       | FC (250 ml)       | Esophageal doppler                                   | SVI                                       | PCA (Vigileo)                                         | SVV                                         | Colloid or Crystalloid  | 10%                                | 0.77                      |
| Biais et al (25)     | 2009 | 30          | 30                         | SURGICAL       | FC (500 ml)       | TTE                                                  | SV                                        | TTE/PCA (Vigileo)                                     | PLR                                         | Crystalloid             | 15%                                | 0.66                      |
| Thiel et al (26)     | 2009 | 89          | 102                        | SEPSIS         | FC (500 ml)       | Ultrasonic cardiac output monitor (USCOM technology) | SV                                        | Ultrasonic cardiac output monitor (USCOM technology)  | PLR                                         | Crystalloid and Colloid | 15%                                | 0.46                      |
| Monnet et al (27)    | 2009 | 34          | 34                         | SEPSIS         | FC (500 ml)       | TDTP (PiCCO)                                         | CI                                        | Arterial pressure/PCA (PiCCO)                         | EEOT                                        | Crystalloid             | 15%                                | 0.67                      |
| Muller et al (28)    | 2010 | 57          | 57                         | SEPSIS         | FC (250-500 ml)   | PAC and TDTP (PiCCO)                                 | SVI                                       | PCA (computer software)                               | PPV                                         | Crystalloid and Colloid | 15%                                | 0.72                      |
| Biais et al (29)     | 2010 | 27          | 27                         | NEUROSURGICAL  | FC (500 ml)       | NC-PCA (Vigileo)                                     | CO                                        | Arterial tracing measurement*/PCA (Vigileo)           | PPV/SVV                                     | Colloid                 | 15%                                | 0.59                      |

| Study                      | Year | Sample Size | Number of Fluid Challenges | Setting                     | Excitation method | Measurement method to assess excitation method       | Peri-excitation macrohemodynamic variable | Method Used to Measure Predictor                                           | Predictor Of Fluid Responsiveness evaluated | Type of fluid used | Definition of Fluid Responsiveness | Fluid Responsiveness Rate |
|----------------------------|------|-------------|----------------------------|-----------------------------|-------------------|------------------------------------------------------|-------------------------------------------|----------------------------------------------------------------------------|---------------------------------------------|--------------------|------------------------------------|---------------------------|
| Zimmermann et al (30)      | 2010 | 20          | 20                         | SURGICAL                    | FC (7 ml/kg)      | NC-PCA (Vigileo)                                     | SVI                                       | PCA (Vigileo)                                                              | SVV                                         | Colloid            | 15%                                | 0.75                      |
| Préau et al (31)           | 2010 | 34          | 34                         | SEPSIS                      | FC (500 ml)       | TTE                                                  | SV                                        | TTE/Arterial pressure/Ultrasonic cardiac output monitor (USCOM technology) | PLR                                         | Colloid            | 15%                                | 0.41                      |
| Lakhal et al (32)          | 2011 | 65          | 65                         | SEPSIS                      | FC (500 ml)       | PAC and TDTP (PiCCO)                                 | CO                                        | Arterial tracing measurement*                                              | PPV                                         | Colloid            | 10%                                | 0.4                       |
| Geerts et al (33)          | 2011 | 24          | 24                         | CARDIOVASCULAR              | FC (500 ml)       | NC-PCA (ModelFlow)                                   | CO                                        | PCA (ModelFlow)                                                            | PPV/SVV                                     | Colloid            | 10%                                | 0.7                       |
| Desgranges et al (34)      | 2011 | 28          | 28                         | CARDIOVASCULAR              | FC (500 ml)       | PAC                                                  | CI                                        | PCA (computer software)                                                    | PPV                                         | Colloid            | 15%                                | 0.67                      |
| Machare-Delgado et al (35) | 2011 | 25          | 25                         | SEPSIS                      | FC (500 ml)       | TTE                                                  | SVI                                       | PCA (Vigileo)                                                              | SVV                                         | Crystalloid        | 10%                                | 0.32                      |
| Huang et al (36)           | 2011 | 30          | 30                         | SEPSIS                      | FC (250 -500 ml)  | Ultrasonic cardiac output monitor (USCOM technology) | SV                                        | Ultrasonic cardiac output monitor (USCOM technology)                       | PLR                                         | Colloid            | 5%                                 | 0.5                       |
| Broch et al (37)           | 2011 | 81          | 81                         | CARDIOVASCULAR              | PLR               | TDTP(PiCCO)                                          | SVI                                       | PCA (PiCCO)                                                                | PPV, SVV                                    | Na                 | 15%                                | 0,5                       |
| Geerts et al (38)          | 2011 | 20          | 20                         | CARDIOVASCULAR              | PLR               | PAC                                                  | CO                                        | PCA (LiDCO)                                                                | SVV                                         | Na                 | 7%                                 | 0.5                       |
| Loupec et al (39)          | 2011 | 40          | 40                         | MEDICAL INTENSIVE CARE UNIT | PLR and FC        | ECO TT                                               | CO                                        | Arterial tracing measurement*                                              | PPV                                         | Colloid            | 15%                                | 0.52                      |
| Muller et al (40)          | 2011 | 39          | 39                         | SEPSIS                      | FC (500 ml)       | TTE                                                  | VTI                                       | TTE                                                                        | MFC                                         | Colloid            | 15%                                | 0.54                      |
| Fellahi et al (41)         | 2012 | 25          | 25                         | CARDIOVASCULAR              | FC (500 ml)       | TDTP (PiCCO)                                         | CI                                        | PCA (PiCCO)                                                                | PLR                                         | Colloid            | 15%                                | 0.56                      |
| Fellahi et al (42)         | 2012 | 25          | 25                         | CARDIOVASCULAR              | FC (500 ml)       | TDTP (PiCCO)                                         | CI                                        | PCA (PiCCO)                                                                | PPV/SVV                                     | Colloid            | 15%                                | 0.84                      |
| Khwannimit et al (43)      | 2012 | 42          | 42                         | SEPSIS                      | FC (500 ml)       | NC-PCA (Vigileo)                                     | SVI                                       | PCA (computer software)/PCA (Vigileo)                                      | PPV/SVV                                     | Colloid            | 15%                                | 0.57                      |

| Study                     | Year | Sample Size | Number of Fluid Challenges | Setting        | Excitation method | Measurement method to assess excitation method | Peri-excitation macrohemodynamic variable | Method Used to Measure Predictor                                                | Predictor Of Fluid Responsiveness evaluated | Type of fluid used      | Definition of Fluid Responsiveness | Fluid Responsiveness Rate |
|---------------------------|------|-------------|----------------------------|----------------|-------------------|------------------------------------------------|-------------------------------------------|---------------------------------------------------------------------------------|---------------------------------------------|-------------------------|------------------------------------|---------------------------|
| Monnet et al (44)         | 2012 | 28          | 28                         | SEPSIS         | FC (500 ml)       | TDTP (PiCCO)                                   | CI                                        | PCA (PiCCO)                                                                     | PPV/PLR/EEOT                                | Crystalloid             | 15%                                | 0.53                      |
| Monnet et al (44)         | 2012 | 26          | 26                         | SEPSIS         | FC (500 ml)       | TDTP (PiCCO)                                   | CI                                        | PCA (PiCCO)                                                                     | PLR/EEOT                                    | Crystalloid             | 15%                                | 0.57                      |
| Monnet et al (45)         | 2012 | 39          | 39                         | SEPSIS         | FC (500 ml)       | TDTP (PiCCO)                                   | CI                                        | Arterial tracing measurement*/PCA (photoplethysmography technology)/PCA (PiCCO) | PPV/SVV/PLR/EEO TT                          | Crystalloid             | 15%                                | 0.43                      |
| Cecconi et al (46)        | 2012 | 31          | 31                         | SURGICAL       | FC (250 ml)       | C-PCA (LiDCO)                                  | SV                                        | PCA (LiDCO)                                                                     | PPV/SVV                                     | Colloid                 | 15%                                | 0.39                      |
| Yazigi et al (47)         | 2012 | 60          | 60                         | CARDIOVASCULAR | FC (7 ml/kg)      | PAC                                            | SVI                                       | Arterial tracing measurement*                                                   | PPV                                         | Colloid                 | 15%                                | 0.68                      |
| Oliveira-Costa et al (48) | 2012 | 37          | 37                         | SEPSIS         | FC (500-1000 ml)  | PAC                                            | CI                                        | Arterial tracing measurement*                                                   | PPV                                         | Crystalloid and Colloid | 15%                                | 0.45                      |
| Biais et al (49)          | 2012 | 35          | 35                         | SURGICAL       | FC (500 ml)       | TTE                                            | SV                                        | Arterial tracing measurement*/PCA (MostCare)                                    | PPV/SVV                                     | Crystalloid             | 15%                                | 0.54                      |
| Fu et al (50)             | 2012 | 51          | 51                         | SURGICAL       | FC (8 ml/kg)      | NC-PCA (Vigileo)                               | SVI                                       | PCA (Vigileo)                                                                   | SVV                                         | Colloid                 | 10%                                | 0.6                       |
| J Li et al (51)           | 2012 | 48          | 157                        | NEUROSURGICAL  | FC (200 ml)       | PAC                                            | SV                                        | PCA (Vigileo)                                                                   | SVV                                         | Crystalloid             | 10%                                | 0.68                      |
| Dong et al (52)           | 2012 | 32          | 32                         | SEPSIS         | FC (500 ml)       | C-PCA (PiCCO)                                  | SVI                                       | PCA (PiCCO)                                                                     | PLR                                         | Colloid                 | 15%                                | 0.68                      |
| Monge et al (53)          | 2012 | 37          | 37                         | SEPSIS         | FC (500 ml)       | Esophageal doppler                             | CO                                        | Esophageal doppler/Capnography/Arterial pressure                                | PLR                                         | Colloid                 | 15%                                | 0.57                      |
| Broch et al(54)           | 2012 | 92          | 92                         | CARDIOVASCULAR | PLR               | TDTP(PiCCO)                                    | SVI                                       | PCA (PiCCO)                                                                     | PPV, SVV                                    | Na                      | 15%                                | 0.57                      |
| Monnet et al (55)         | 2013 | 35          | 35                         | SEPSIS         | FC (500 ml)       | TDTP (PiCCO)                                   | CI                                        | PCA (PiCCO)                                                                     | PPV/SVV                                     | Crystalloid             | 15%                                | 0.42                      |
| Monnet et al (56)         | 2013 | 40          | 40                         | SEPSIS         | FC (500 ml)       | TDTP (PiCCO)                                   | CI                                        | PCA (PiCCO)/Capnography                                                         | PLR                                         | Crystalloid             | 15%                                | 0.52                      |
| Davies et al (57)         | 2013 | 21          | 96                         | SURGICAL       | FC (250 ml)       | Esophageal doppler                             | SV                                        | PCA (LiDCO)                                                                     | PPV/SVV                                     | Colloid                 | 10%                                | 0.36                      |

| Study                         | Year | Sample Size | Number of Fluid Challenges | Setting                     | Excitation method | Measurement method to assess excitation method | Peri-excitation macrohemodynamic variable | Method Used to Measure Predictor                  | Predictor Of Fluid Responsiveness evaluated | Type of fluid used            | Definition of Fluid Responsiveness | Fluid Responsiveness Rate |
|-------------------------------|------|-------------|----------------------------|-----------------------------|-------------------|------------------------------------------------|-------------------------------------------|---------------------------------------------------|---------------------------------------------|-------------------------------|------------------------------------|---------------------------|
| Nordstrom et al (58)          | 2013 | 20          | 86                         | SURGICAL                    | FC (200 ml)       | Esophageal doppler                             | SV                                        | PCA (LiDCO)                                       | PPV/SVV                                     | Colloid                       | 10%                                | 0.31                      |
| Fischer et al (59)            | 2013 | 37          | 37                         | CARDIOVASCULAR              | FC (500 ml)       | TDTP (PiCCO)                                   | CI                                        | PCA (PiCCO)/PCA (photoplethysmography technology) | PPV/SVV                                     | Colloid                       | 15%                                | 0.73                      |
| Ishihara et al (60)           | 2013 | 43          | 43                         | SURGICAL                    | FC (250 ml)       | TDTP (PiCCO)                                   | CI                                        | PCA (PiCCO)                                       | PPV                                         | Colloid                       | 15%                                | 0.5                       |
| Drvar et al (61)              | 2013 | 46          | 46                         | SEPSIS                      | FC (500 ml)       | TDTP (LiDCO)                                   | SVI                                       | PCA (LiDCO)                                       | PPV                                         | Colloid                       | 15%                                | 0.57                      |
| Freitas et al (62)            | 2013 | 40          | 40                         | SEPSIS                      | FC (7 ml/kg)      | C-TD                                           | CO                                        | PCA (computer software)                           | PPV                                         | Colloid                       | 15%                                | 0.47                      |
| Treppe et al(63)              | 2013 | 24          | 72                         | SURGICAL                    | FC (300 ml)       | TDTP (PiCCO)                                   | CI                                        | PCA (PiCCO)                                       | PPV/SVV                                     | Colloid                       | 10%                                | 0.57                      |
| Yang et al (64)               | 2013 | 44          | 44                         | NEUROSURGICAL               | FC (6 ml/kg)      | Esophageal doppler                             | SVI                                       | PCA (computer software)                           | PPV                                         | Colloid                       | 10%                                | 0.59                      |
| Kim et al (65)                | 2013 | 33          | 33                         | CARDIOVASCULAR              | FC (500 ml)       | PAC                                            | SVI                                       | PCA (Vigileo)                                     | SVV                                         | Colloid                       | 12%                                | 0.63                      |
| Saugel et al (66)             | 2013 | 24          | 24                         | MEDICAL INTENSIVE CARE UNIT | FC (7 ml/kg)      | TDTP (PiCCO)                                   | CI                                        | PCA (PiCCO)                                       | PLR                                         | Crystalloid                   | 15%                                | 0.29                      |
| Kupersztych-Hagege et al (67) | 2013 | 48          | 48                         | SEPSIS                      | FC (500 ml)       | TDTP (PiCCO)                                   | CI                                        | PCA (PiCCO)                                       | PLR                                         | Crystalloid                   | 15%                                | 0.6                       |
| Silva et al(68)               | 2013 | 34          | 34                         | SEPSIS                      | PLR               | C-PCA(PiCCO)                                   | CI                                        | PCA (PiCCO)                                       | EEOT                                        | Na                            | 10%                                | 0,29                      |
| Pei et al (69)                | 2014 | 32          | 32                         | SURGICAL                    | FC (250 ml)       | NC-PCA (Vigileo)                               | SVI                                       | PCA (computer software)/PCA (Vigileo)             | PPV                                         | Colloid                       | 10%                                | 0.34                      |
| Hoiseth et al (70)            | 2014 | 23          | 31                         | CARDIOVASCULAR              | FC (250-500 ml)   | Esophageal doppler                             | SV                                        | Arterial tracing measurement*/PCA (Vigileo)       | PPV/SVV                                     | Crystalloid. Colloid and PRBC | 15%                                | 0.37                      |
| Guarracino et al (71)         | 2014 | 50          | 50                         | SEPSIS                      | FC (7 ml/kg)      | NC-PCA (MostCare)                              | CI                                        | PCA (MostCare)                                    | PPV                                         | Crystalloid                   | 15%                                | 0.6                       |
| Song et al (72)               | 2014 | 40          | 40                         | CARDIOVASCULAR              | FC (6 ml/kg)      | C-TD                                           | SVI                                       | PCA (computer software)                           | PPV                                         | Colloid                       | 15%                                | 0.57                      |
| Shim et al (73)               | 2014 | 34          | 34                         | CARDIOVASCULAR              | FC (6 ml/kg)      | C-TD                                           | SVI                                       | PCA (computer software)                           | PPV                                         | Colloid                       | 12%                                | 0.5                       |

| Study                     | Year | Sample Size | Number of Fluid Challenges | Setting                     | Excitation method | Measurement method to assess excitation method | Peri-excitation macrohemodynamic variable | Method Used to Measure Predictor      | Predictor Of Fluid Responsiveness evaluated | Type of fluid used      | Definition of Fluid Responsiveness | Fluid Responsiveness Rate |
|---------------------------|------|-------------|----------------------------|-----------------------------|-------------------|------------------------------------------------|-------------------------------------------|---------------------------------------|---------------------------------------------|-------------------------|------------------------------------|---------------------------|
| Fisher et al (74)         | 2014 | 50          | 50                         | CARDIOVASCULAR              | FC (500 ml)       | TDTP (PiCCO)                                   | CI                                        | PCA (PiCCO)                           | PPV                                         | Colloid                 | 15%                                | 0.82                      |
| Kurts et al (75)          | 2014 | 10          | 57                         | NEUROSURGICAL               | FC (250 ml)       | C-PCA (PiCCO)                                  | CI                                        | PCA (PiCCO)                           | SVV                                         | Colloid                 | 10%                                | 0.47                      |
| Guinot et al (76)         | 2014 | 42          | 42                         | SURGICAL                    | FC (500 ml)       | Esophageal doppler                             | SV                                        | Esophageal doppler                    | SVV                                         | Crystalloid             | 15%                                | 0.67                      |
| Kang et al (77)           | 2014 | 54          | 54                         | CARDIOVASCULAR              | FC (250 ml)       | IMPEDANCE                                      | CO                                        | Bioimpedance technique                | SVV                                         | Colloid                 | 7%                                 | 0.5                       |
| Guinot et al (78)         | 2014 | 42          | 42                         | SURGICAL                    | FC (500 ml)       | Esophageal doppler                             | SV                                        | Esophageal doppler/TTE                | EEOT                                        | Crystalloid             | 15%                                | 0.67                      |
| Wu et al (79)             | 2014 | 50          | 50                         | SEPSIS                      | FC (500 ml)       | TTE                                            | SV                                        | TTE                                   | MFC                                         | Crystalloid             | 15%                                | 0.54                      |
| Messina et al (80)        | 2015 | 27          | 27                         | SEPSIS                      | FC (500 ml)       | NC-PCA (Mostcare)                              | CI                                        | PCA (MostCare)                        | PPV                                         | Crystalloid             | 15%                                | 0.33                      |
| Zhao et al (81)           | 2015 | 25          | 25                         | SURGICAL                    | FC (250 ml)       | NC-PCA (Vigileo)                               | SVI                                       | PCA (computer software)/PCA (Vigileo) | PPV/SVV                                     | Colloid                 | 10%                                | 0.48                      |
| Ibarra-Estrada et al (82) | 2015 | 19          | 59                         | SEPSIS                      | FC (7 ml/kg)      | TDTP (PiCCO)                                   | SVI                                       | PCA (computer software)/PCA (PiCCO)   | PPV/SVV/PLR                                 | Crystalloid             | 15%                                | 0.51                      |
| Angappan et al (83)       | 2015 | 45          | 45                         | SEPSIS                      | FC (500 ml)       | NC-PCA (Vigileo)                               | CI                                        | PCA (Vigileo)                         | SVV                                         | Colloid                 | 15%                                | 0.64                      |
| Airapetian et al (84)     | 2015 | 59          | 59                         | MEDICAL INTENSIVE CARE UNIT | FC (500 ml)       | TTE                                            | CO                                        | Abdominal ultrasonography /TTE        | PLR                                         | Crystalloid             | 10%                                | 0.49                      |
| Guinot et al (85)         | 2015 | 73          | 73                         | SURGICAL                    | FC (500 ml)       | IMPEDANCE                                      | SV                                        | IMPEDANCE                             | MFC                                         | Crystalloid             | 15%                                | 0.37                      |
| Mallat et al (86)         | 2015 | 49          | 49                         | SEPSIS                      | FC (500 ml)       | TDTP(PiCCO)                                    | CI                                        | PCA (PiCCO)                           | MFC                                         | Colloid                 | 15%                                | 0.45                      |
| Theerawit et al (87)      | 2016 | 29          | 29                         | SEPSIS                      | FC (500-1000 ml)  | NC-PCA (Vigileo)                               | CO                                        | PCA (Vigileo)                         | SVV                                         | Crystalloid and Colloid | 15%                                | 0.55                      |
| Lee et al (88)            | 2016 | 40          | 40                         | SURGICAL                    | FC (6 ml/kg)      | TTE                                            | SVI                                       | PCA (computer software)/PCA (Vigileo) | PPV/SVV                                     | Colloid                 | 15%                                | 0.65                      |
| Cherpanath et al (89)     | 2016 | 22          | 22                         | CARDIOVASCULAR              | FC (500 ml)       | NC-PCA (ModelFlow)                             | CO                                        | PCA (computer software)               | PPV/SVV                                     | Colloid                 | 15%                                | 0.86                      |
| Zhang et al (90)          | 2016 | 40          | 40                         | SURGICAL                    | FC (7 ml/kg)      | NC-PCA (Vigileo)                               | SVI                                       | PCA (Vigileo)                         | SVV                                         | Colloid                 | 15%                                | 0.65                      |

| Study                  | Year | Sample Size | Number of Fluid Challenges | Setting        | Excitation method | Measurement method to assess excitation method | Peri-excitation macrohemodynamic variable | Method Used to Measure Predictor                                    | Predictor Of Fluid Responsiveness evaluated | Type of fluid used      | Definition of Fluid Responsiveness | Fluid Responsiveness Rate |
|------------------------|------|-------------|----------------------------|----------------|-------------------|------------------------------------------------|-------------------------------------------|---------------------------------------------------------------------|---------------------------------------------|-------------------------|------------------------------------|---------------------------|
| Fisher et al (91)      | 2016 | 78          | 78                         | CARDIOVASCULAR | FC (500 ml)       | TDTP (PiCCO)                                   | CI                                        | PCA (PiCCO)                                                         | PLR                                         | Colloid                 | 15%                                | 0.71                      |
| Kim et al (92)         | 2016 | 43          | 43                         | CARDIOVASCULAR | FC (300 ml)       | C-TD                                           | SVI                                       | C-TD                                                                | PLR                                         | Colloid                 | 10%                                | 0.35                      |
| de Oliveira et al (93) | 2016 | 20          | 20                         | NEUROSURGICAL  | FC (500 ml)       | ECO TT                                         | VTI                                       | PCA (computer software)                                             | PPV                                         | Crystalloid             | 15%                                | 0.45                      |
| Sobczyk et al (94)     | 2016 | 35          | 35                         | CARDIOVASCULAR | FC (250 ml)       | TTE                                            | CO                                        | TTE                                                                 | PLR                                         | Crystalloid             | 15%                                | 0.68                      |
| Liu et al (95)         | 2016 | 96          | 96                         | SEPSIS         | FC (500 ml)       | TDTP (PiCCO)                                   | CO                                        | PCA (PiCCO)                                                         | PPV                                         | Crystalloid             | 15%                                | 0.54                      |
| Vistisen et al (96)    | 2016 | 41          | 41                         | CARDIOVASCULAR | FC (500 ml)       | C-TD                                           | SV                                        | Arterial tracing measurement*                                       | PPV                                         | Crystalloid and Colloid | 15%                                | 0.41                      |
| Lagreze et al (97)     | 2016 | 40          | 40                         | SURGICAL       | FC (500 ml)       | Esophageal doppler                             | CO                                        | Capnography                                                         | MFC                                         | Colloid                 | 15%                                | 0.38                      |
| Kridge et al (98)      | 2016 | 33          | 33                         | SEPSIS         | FC (250 ml)       | NC-PCA(Vigileo)                                | CO                                        | PCA (Vigileo)                                                       | PLR                                         | Colloid                 | 15%                                | 0.3                       |
| Myatra et al (99)      | 2017 | 20          | 30                         | SEPSIS         | FC (7 ml/kg)      | TDTP (PiCCO)                                   | CI                                        | PCA (computer software)/PCA (PiCCO)                                 | PPV/SVV/EEOT/VT C                           | Crystalloid             | 15%                                | 0.53                      |
| Yonis et al (100)      | 2017 | 33          | 33                         | SEPSIS         | FC (500 ml)       | TDTP (PiCCO)                                   | CI                                        | PCA (PiCCO)                                                         | PPV/EEOTT                                   | Crystalloid             | 15%                                | 0.45                      |
| Renner et al (101)     | 2017 | 39          | 39                         | SURGICAL       | FC (500 ml)       | TDTP (PiCCO)                                   | SVI                                       | PCA (PiCCO)/PCA (photoplethysmography technology)                   | PPV                                         | Crystalloid             | 15%                                | 0.61                      |
| Min et al (102)        | 2017 | 40          | 40                         | NEUROSURGICAL  | FC (6 ml/kg)      | NC-PCA (Vigileo)                               | CI                                        | PCA (computer software)/Arterial tracing measurement*/PCA (Vigileo) | PPV/SVV                                     | Colloid                 | 12%                                | 0.47                      |
| Blais et al (103)      | 2017 | 41          | 41                         | NEUROSURGICAL  | FC (250 ml)       | NC-PCA (Pulsioflex/ProAQT)                     | SVI                                       | PCA (Pulsioflex system) /Others/Arterial pressure                   | PPV/EEOTT                                   | Crystalloid             | 10%                                | 0.48                      |
| Biais et al (104)      | 2017 | 88          | 44                         | NEUROSURGICAL  | FC (250 ml)       | NC-PCA(PulsioFlex/ProAQT)                      | SVI                                       | PCA (Pulsioflex)                                                    | MFC                                         | Crystalloid             | 10%                                | 0.31                      |
| Messina et al (105)    | 2017 | 46          | 46                         | SURGICAL       | FC (500 ml)       | NC-PCA (MostCare)                              | CI                                        | PCA (MostCare)                                                      | PPV                                         | Crystalloid             | 15%                                | 0.41                      |
| Lu et al (106)         | 2017 | 49          | 49                         | SEPSIS         | FC (200 ml)       | C-PCA (PiCCO)                                  | CI                                        | PCA (PiCCO)                                                         | SVV                                         | Crystalloid             | 10%                                | 0.55                      |



| Study                    | Year | Sample Size | Number of Fluid Challenges | Setting        | Excitation method | Measurement method to assess excitation method | Peri-excitation macrohemodynamic variable | Method Used to Measure Predictor                         | Predictor Of Fluid Responsiveness evaluated | Type of fluid used | Definition of Fluid Responsiveness | Fluid Responsiveness Rate |
|--------------------------|------|-------------|----------------------------|----------------|-------------------|------------------------------------------------|-------------------------------------------|----------------------------------------------------------|---------------------------------------------|--------------------|------------------------------------|---------------------------|
| El Hadouti et al (107)   | 2017 | 41          | 41                         | SURGICAL       | FC (500 ml)       | TTE                                            | SV                                        | TTE                                                      | PLR                                         | Crystalloid        | 15%                                | 0.54                      |
| Jozwiak et al (108)      | 2017 | 30          | 30                         | SEPSIS         | FC (500 ml)       | TDTP (PICCO)                                   | CI                                        | PCA (PICCO)/TTE                                          | EEOT                                        | Crystalloid        | 15%                                | 0.5                       |
| Renner et al (109)       | 2017 | 46          | 46                         | SURGICAL       | PLR               | TD                                             | SVI                                       | PCA (PICCO)                                              | PLR                                         | Na                 | 15%                                | 0.45                      |
| Xu et al (110)           | 2017 | 34          | 34                         | SEPSIS         | FC (250 ml)       | IMPEDANCE                                      | SV                                        | IMPEDANCE                                                | SVV                                         | Crystalloid        | 10%                                | 0.41                      |
| Guo-Guang Ma et al (111) | 2018 | 70          | 70                         | CARDIOVASCULAR | FC (500 ml)       | NC-PCA (Vigileo)                               | SV                                        | PCA (Vigileo)                                            | SVV/PLR                                     | Colloid            | 10%                                | 0.5                       |
| Wu et al (112)           | 2018 | 62          | 62                         | SEPSIS         | FC (250 ml)       | TTE                                            | SV                                        | TTE/Ultrasonic cardiac output monitor (USCOM technology) | PLR                                         | Crystalloid        | 15%                                | 0.45                      |
| Si et al (113)           | 2018 | 40          | 40                         | SEPSIS         | FC (250 ml)       | TDTP (PICCO)                                   | SV                                        | PCA (PICCO)/Arterial pressure                            | PLR                                         | Colloid            | 15%                                | 0.65                      |
| Georges et al (114)      | 2018 | 50          | 50                         | NEUROLOGICAL   | FC (500 ml)       | ECO TT                                         | CO                                        | TTE                                                      | EEOT                                        | Crystalloid        | 15%                                | 0.56                      |
| Joosten et al (115)      | 2019 | 57          | 57                         | CARDIOVASCULAR | FC (5 ml/kg)      | TDTP (PICCO)                                   | CO                                        | Calculated by application/PCA (computer software)        | PPV                                         | Colloid            | 10%                                | 0.46                      |
| Ali et al (116)          | 2019 | 88          | 88                         | NEUROSURGICAL  | FC (500 ml)       | NC-PCA (Vigileo)                               | SVI                                       | PCA (computer software)                                  | PPV                                         | Crystalloid        | 15%                                | 0.44                      |
| He et al (117)           | 2019 | 79          | 79                         | SURGICAL       | FC (6 ml/kg)      | TTE                                            | VTI                                       | PCA (computer software)                                  | PPV                                         | Colloid            | 15%                                | 0.48                      |
| Ali et al (118)          | 2019 | 33          | 33                         | NEUROSURGICAL  | FC (500 ml)       | NC-PCA (Vigileo)                               | SVI                                       | PCA (computer software)/PCA (Vigileo)                    | PPV/SVV                                     | Crystalloid        | 15%                                | 0.45                      |
| Xu et al (119)           | 2019 | 75          | 75                         | CARDIOVASCULAR | FC (6 ml/kg)      | TEE                                            | VTI                                       | PCA (Vigileo)/TEE/Arterial pressure                      | SVV/EEOT                                    | Crystalloid        | 15%                                | 0.48                      |
| Trifi et al (120)        | 2019 | 26          | 30                         | SEPSIS         | FC (500 ml)       | TTE                                            | SV                                        | TTE                                                      | PLR                                         | Crystalloid        | 15%                                | 0.63                      |
| Beurton et al (121)      | 2019 | 30          | 30                         | SEPSIS         | FC (500 ml)       | TDTP (PICCO)                                   | CI                                        | PCA (PICCO)                                              | PLR                                         | Crystalloid        | 15%                                | 0.5                       |

| Study                | Year | Sample Size | Number of Fluid Challenges | Setting                     | Excitation method | Measurement method to assess excitation method | Peri-excitation macrohemodynamic variable | Method Used to Measure Predictor      | Predictor Of Fluid Responsiveness evaluated | Type of fluid used | Definition of Fluid Responsiveness | Fluid Responsiveness Rate |
|----------------------|------|-------------|----------------------------|-----------------------------|-------------------|------------------------------------------------|-------------------------------------------|---------------------------------------|---------------------------------------------|--------------------|------------------------------------|---------------------------|
| Depret et al (122)   | 2019 | 28          | 28                         | SEPSIS                      | FC (500 ml)       | TDTP (PiCCO)                                   | CI                                        | PCA (PiCCO)/Esophageal doppler        | EEOT                                        | Crystalloid        | 15%                                | 0.5                       |
| Messina et al (123)  | 2019 | 40          | 40                         | NEUROQX                     | FC (250 ml)       | NC-PCA (Mostcare)                              | SVI                                       | Others                                | EEOT/VTC                                    | Crystalloid        | 10%                                | 0.52                      |
| Fot et al (124)      | 2019 | 33          | 33                         | CARDIOVASCULAR              | FC (7 ml/kg)      | TDTP(PiCCO)                                    | CI                                        | PCA (PiCCO)                           | MFC                                         | Crystalloid        | 15%                                | 0.43                      |
| Beurton et al (125)  | 2019 | 72          | 72                         | SEPSIS                      | PLR               | C-PCA(PiCCO)                                   | CI                                        | Others                                | PLR                                         | Na                 | 10%                                | 0.47                      |
| Jun et al (126)      | 2019 | 38          | 38                         | SURGICAL                    | FC (6 ml/kg)      | Esophageal doppler                             | SVI                                       | Esophageal doppler/Others             | VTC                                         | Colloid            | 15%                                | 0.64                      |
| Lee et al (127)      | 2020 | 50          | 50                         | NEUROSURGICAL               | FC (500 ml)       | NC-PCA (Vigileo)                               | SV                                        | PCA (computer software)/PCA (Vigileo) | PPV/SVV                                     | Colloid            | 15%                                | 0.6                       |
| Wang et al (128)     | 2020 | 44          | 44                         | SEPSIS                      | FC (500 ml)       | TDTP (PiCCO)                                   | CI                                        | PCA (PiCCO)                           | PPV/SVV                                     | Crystalloid        | 15%                                | 0.54                      |
| Bapteste et al (129) | 2020 | 31          | 31                         | NEUROSURGICAL               | FC (250 ml)       | Esophageal doppler                             | SV                                        | PCA (computer software)               | PPV                                         | Colloid            | 10%                                | 0.42                      |
| Bubenek et al (130)  | 2020 | 40          | 266                        | SURGICAL                    | FC (500 ml)       | NC-PCA (Vigileo)                               | CI                                        | PCA (Vigileo)                         | SVV                                         | Colloid            | 11%                                | 0.91                      |
| Hou et al (131)      | 2020 | 102         | 102                        | SEPSIS                      | FC (250 ml)       | NC-PCA (Vigileo)                               | SV                                        | Arterial pressure                     | PLR                                         | Colloid            | 15%                                | 0.52                      |
| Weil et al (132)     | 2020 | 46          | 115                        | SURGICAL                    | FC (250 ml)       | NC-PCA (PulsioFlex/ProAQT)                     | CI                                        | Others                                | EE0                                         | Colloid            | 5%                                 | 0.38                      |
| Messina et al (133)  | 2020 | 40          | 40                         | NEUROSURGICAL               | FC (250 ml)       | NC-PCA(MostCare)                               | SVI                                       | PCA(MostCare)                         | VTC                                         | Crystalloid        | 10%                                | 0.47                      |
| Hamzaoui et al (134) | 2021 | 54          | 54                         | MEDICAL INTENSIVE CARE UNIT | PLR               | ECO TT                                         | VTI                                       | TTE                                   | VTC, PLR                                    | Na                 | 12%                                | 0.4                       |
| Giraud et al (135)   | 2021 | 33          | 33                         | CARDIOVASCULAR              | PLR               | ECO TT                                         | VTI                                       | Others                                | PLR                                         | Na                 | 15%                                | 0.45                      |
| Kaur et al (136)     | 2021 | 67          | 67                         | MEDICAL INTENSIVE CARE UNIT | FC (10 ml/kg)     | NC-PCA (Vigileo)                               | CO                                        | PCA (Vigileo)                         | SVV                                         | Crystalloid        | 15%                                | 0.67                      |

| Study                | Year | Sample Size | Number of Fluid Challenges | Setting                     | Excitation method      | Measurement method to assess excitation method | Peri-excitation macrohemodynamic variable | Method Used to Measure Predictor | Predictor Of Fluid Responsiveness evaluated | Type of fluid used | Definition of Fluid Responsiveness | Fluid Responsiveness Rate |
|----------------------|------|-------------|----------------------------|-----------------------------|------------------------|------------------------------------------------|-------------------------------------------|----------------------------------|---------------------------------------------|--------------------|------------------------------------|---------------------------|
| Bataille et al (137) | 2021 | 100         | 100                        | SEPSIS                      | FC (500 ml)            | TTE                                            | SV                                        | TTE                              | PLR                                         | Crystalloid        | 15%                                | 0.5                       |
| Lizuka et al (138)   | 2021 | 41          | 41                         | SURGICAL                    | FC (250 ml)            | NC-PCA (Vigileo)                               | SV                                        | Others/PCA (Vigileo)             | EEOT                                        | Crystalloid        | 10%                                | 0.39                      |
| Messina et al (139)  | 2021 | 103         | 103                        | SURGICAL                    | FC (4 ml/kg)           | NC-PCA (MostCare)                              | SVI                                       | PCA (MostCare)                   | PPV, SVV, EEOT, MFC                         | Crystalloid        | 10%                                | 0.51                      |
| Watanabe et al(140)  | 2021 | 30          | 30                         | NEUROSURGICAL               | FC (250 ml)            | NC-PCA(Vigileo)                                | SV                                        | Arterial tracing measurement*    | PPV, SVV                                    | Colloid            | 10%                                | 0.43                      |
| Chen et al (141)     | 2021 | 27          | 27                         | SEPSIS                      | FC (500 ml)            | TDTP(PiCCO)                                    | CI                                        | PCA (PiCCO)                      | PPV, SVV                                    | Colloid            | 15%                                | 0.59                      |
| Taccheri et al (142) | 2021 | 30          | 30                         | SEPSIS                      | PLR                    | C-PCA(PiCCO)                                   | CI                                        | PCA (PiCCO)                      | VTC, PLR                                    | Na                 | 10%                                | 0.5                       |
| Elsayed et al (143)  | 2021 | 46          | 46                         | SEPSIS                      | FC (4 ml/kg)           | TTE                                            | CO                                        | TTE                              | VTC, PLR                                    | Crystalloid        | 15%                                | 0.34                      |
| Shi et al (144)      | 2022 | 84          | 58                         | SEPSIS                      | Trendelenburg and EEOT | TDTP(PiCCO)                                    | CI                                        | PCA (PiCCO)                      | EEOT, VTC, PPV                              | Na                 | 5% or 8%                           | 0.5                       |
| Shi et al (145)      | 2022 | 35          | 35                         | SEPSIS                      | PLR                    | C-PCA(PiCCO)                                   | CI or VTI                                 | Arterial pressure                | PLR                                         | Na                 | 10% or 12%                         | 0.4                       |
| Abdullah et al(146)  | 2022 | 55          | 55                         | MEDICAL INTENSIVE CARE UNIT | FC (500 ml)            | NC-PCA(Vigileo)                                | SVI                                       | PCA (Vigileo)                    | SVV                                         | Crystalloid        | 15%                                | 0.46                      |
| Xu et al (147)       | 2022 | 76          | 76                         | SEPSIS                      | FC (6 ml/kg)           | TDTP(PiCCO)                                    | CI                                        | PCA (PiCCO)                      | VTC                                         | Crystalloid        | 15%                                | 0.4                       |
| Mallat et al (148)   | 2022 | 270         | 270                        | MEDICAL INTENSIVE CARE UNIT | FC (4 ml/kg)           | TTE and TDTP(PiCCO)                            | CI                                        | PCA (PiCCO) and TTE              | PLR                                         | Crystalloid        | 15%                                | 0.6                       |
| Botros et al (149)   | 2023 | 48          | 48                         | SURGICAL                    | FC (6 ml/kg)           | Esophageal doppler                             | SVI                                       | Others                           | VTC                                         | Crystalloid        | 10%                                | 0.41                      |

**Table S1.** General characteristics of selected studies. Values are expressed as pooled values (95% confidence interval). ABF, aortic blood flow; C-TD, continuous thermodilution; C-PCA, calibrated pulse contour analysis; CO, cardiac output; CI, cardiac index; EEOT, end-expiratory occlusion test; FC; fluid challenge; NC-PCA, non-calibrated pulse contour analysis; PAC, pulmonary artery catheter; PLR, passive leg raising; PPV, pulse pressure variation; PRBC, packed red blood cells; SV, stroke volume; SVI, stroke volume index; SVV, stroke volume variation; TD, thermodilution; TEE, transesophageal echocardiography; TPTD, transpulmonary thermodilution; TTE, transthoracic echocardiography; VTI, velocity time integral. \*The arterial tracing measurement elucidates the manually performed measurement of Pulse Pressure Variation.

| Study                 | Year | Number total of patients | True positive | Fluid responders | True negative | Non-fluid responders | Cut-off | Sensitivity | Specificity | AUC             |
|-----------------------|------|--------------------------|---------------|------------------|---------------|----------------------|---------|-------------|-------------|-----------------|
| Michard et al (1)     | 2000 | 40                       | 15            | 16               | 21            | 22                   | 13      | 0.94        | 0.96        | 0.98±0.03       |
| Kramer et al (3)      | 2004 | 21                       | 6             | 6                | 14            | 15                   | 11      | 1           | 0.93        | 0.99            |
| De Backer et al (4)   | 2005 | 27                       | 13            | 15               | 11            | 12                   | 12.8    | 0.88        | 0.89        | 0.89±0.07       |
| De Backer et al (4)   | 2005 | 33                       | 12            | 18               | 10            | 15                   | 8       | 0.66        | 0.65        | 0.71±0.09       |
| Feissel et al (5)     | 2005 | 20                       | 11            | 13               | 7             | 7                    | 17      | 0.85        | 1           | 0.96±0.03       |
| Hofer et al (6)       | 2005 | 35                       | 15            | 21               | 10            | 14                   | 13.5    | 0.72        | 0.72        | 0.80(0.67-0.94) |
| Lafanechere et al (7) | 2006 | 22                       | 7             | 10               | 11            | 12                   | 12      | 0.7         | 0.92        | 0.78            |
| Charron et al (9)     | 2006 | 21                       | 8             | 9                | 10            | 12                   | 10      | 0.89        | 0.83        | 0.95(0.85-1.00) |
| Monnet et al (8)      | 2006 | 30                       | 14            | 16               | 13            | 14                   | 12      | 0.88        | 0.93        | 0.91±0.05       |
| Cannesson et al (10)  | 2007 | 25                       | 12            | 15               | 9             | 10                   | 11      | 0.8         | 0.9         | 0.84±0.08       |
| Feissel et al (11)    | 2007 | 28                       | 18            | 18               | 7             | 10                   | 12      | 1           | 0.7         | 0.94±0.05       |
| Wyffels et al (12)    | 2007 | 32                       | 19            | 20               | 11            | 12                   | 11.8    | 0.95        | 0.91        | 0.94(0.79-0.99) |
| Auler et al (15)      | 2008 | 59                       | 38            | 39               | 19            | 20                   | 12      | 0.97        | 0.95        | 0.98±0.01       |
| Cannesson et al (16)  | 2008 | 25                       | 14            | 16               | 8             | 9                    | 12.5    | 0.87        | 0.89        | 0.93±0.04       |
| Cannesson et al (16)  | 2008 | 25                       | 14            | 16               | 8             | 9                    | 10.5    | 0.87        | 0.89        | 0.94±0.04       |
| Huang et al(17)       | 2008 | 22                       | 7             | 10               | 12            | 12                   | 11.8    | 0.68        | 1           | 0.76            |
| Derichard et al (18)  | 2009 | 56                       | 28            | 32               | 22            | 24                   | 13      | 0.88        | 0.92        | 0.96(0.70-1.00) |
| Derichard et al (18)  | 2009 | 56                       | 29            | 32               | 22            | 24                   | 13      | 0.89        | 0.91        | 0.96(0.72-1.00) |
| de Wall et al (19)    | 2009 | 22                       | 7             | 11               | 11            | 11                   | 10      | 0.64        | 1           | 0.88±0.007      |
| Cannesson et al (20)  | 2009 | 25                       | 15            | 17               | 7             | 8                    | 10      | 0.88        | 0.87        | 0.85±0.08       |
| Monge et al (21)      | 2009 | 38                       | 18            | 19               | 18            | 19                   | 10      | 0.95        | 0.95        | 0.97±0.03       |
| Vistisen et al (22)   | 2009 | 23                       | 16            | 17               | 5             | 6                    | 6.5     | 0.94        | 0.83        | NR              |
| Vallee et al (23)     | 2009 | 42                       | 5             | 16               | 19            | 26                   | 15      | 0.32        | 0.75        | 0.62(0.45-0.80) |

| Study                     | Year | Number total of patients | True positive | Fluid responders | True negative | Non-fluid responders | Cut-off | Sensitivity | Specificity | AUC             |
|---------------------------|------|--------------------------|---------------|------------------|---------------|----------------------|---------|-------------|-------------|-----------------|
| Vallee et al (23)         | 2009 | 42                       | 16            | 24               | 14            | 18                   | 15      | 0.65        | 0.77        | 0.75(0.60-0.89) |
| Muller et al (28)         | 2010 | 57                       | 25            | 41               | 15            | 16                   | 7       | 0.61        | 0.94        | 0.77(0.65-0.90) |
| Biais et al (29)          | 2010 | 27                       | 14            | 16               | 9             | 11                   | 11      | 0.88        | 0.82        | 0.94(0.78-0.99) |
| Biais et al (29)          | 2010 | 27                       | 17            | 17               | 8             | 10                   | 15      | 1           | 0.8         | 0.95(0.80-0.99) |
| Lakhal et al (32)         | 2011 | 65                       | 19            | 26               | 33            | 39                   | 6.5     | 0.73        | 0.85        | 0.75(0.62-0.85) |
| Geerts et al (33)         | 2011 | 24                       | 13            | 17               | 5             | 7                    | 9       | 0.77        | 0.71        | 0.84(0.64-0.96) |
| Broch et al (37)          | 2011 | 81                       | 36            | 45               | 27            | 36                   | 8       | 0.79        | 0.76        | 0.83(0.74-0.96) |
| Loupec et al              | 2011 | 40                       | 21            | 21               | 18            | 19                   | 9       | 1           | 0.94        | 0.97(0.86-0.99) |
| Desgranges et al (34)     | 2011 | 28                       | 14            | 19               | 8             | 9                    | 8       | 0.74        | 0.89        | 0.83±0.08       |
| Fellahi et al (42)        | 2012 | 25                       | 17            | 21               | 3             | 4                    | 6.5     | 0.81        | 0.75        | 0.86(0.67-1.06) |
| Khwannimit et al (43)     | 2012 | 42                       | 20            | 24               | 15            | 18                   | 8       | 0.83        | 0.83        | 0.91(0.82-1.00) |
| Monnet et al (45)         | 2012 | 39                       | 15            | 17               | 20            | 22                   | 10      | 0.88        | 0.91        | 0.89(0.77-1.01) |
| Monnet et al (45)         | 2012 | 39                       | 14            | 17               | 20            | 22                   | 11      | 0.82        | 0.91        | 0.89(0.78-1.01) |
| Monnet et al (44)         | 2012 | 26                       | 13            | 15               | 11            | 11                   | 12      | 0.85        | 1           | 0.98±0.03       |
| Monnet et al (44)         | 2012 | 28                       | 15            | 15               | 4             | 13                   | 4       | 1           | 0.31        | 0.69±0.10       |
| Cecconi et al (46)        | 2012 | 31                       | 17            | 20               | 8             | 11                   | 13      | 0.83        | 0.74        | 0.87(0.76-0.99) |
| Yazigi et al (47)         | 2012 | 60                       | 33            | 41               | 14            | 19                   | 11.5    | 0.8         | 0.74        | 0.85(0.75-0.94) |
| Oliveira-Costa et al (48) | 2012 | 37                       | 9             | 17               | 19            | 20                   | 10      | 0.53        | 0.95        | 0.74(0.56-0.90) |
| Biais et al (49)          | 2012 | 35                       | 17            | 19               | 14            | 16                   | 10      | 0.89        | 0.88        | 0.95(0.82-0.99) |
| Broch et al               | 2012 | 92                       | 37            | 53               | 31            | 39                   | 11      | 0.7         | 0.79        | 0.82(0.73-0.91) |
| Monnet et al (55)         | 2013 | 35                       | 14            | 15               | 19            | 20                   |         | 0.93        | 0.95        | 0.93±0.06       |
| Davies et al (57)         | 2013 | 96                       | 30            | 35               | 21            | 61                   | 12      | 0.84        | 0.25        | 0.61(0.46-0.76) |
| Nordstrom et al (58)      | 2013 | 86                       | 21            | 27               | 27            | 59                   | 8.5     | 0.79        | 0.45        | 0.66(0.52-0.79) |
| Fischer et al (59)        | 2013 | 37                       | 12            | 27               | 10            | 10                   | 16      | 0.44        | 1           | 0.73(0.57-0.86) |
| Fischer et al (59)        | 2013 | 37                       | 13            | 27               | 8             | 10                   | 19      | 0.48        | 0.8         | 0.57(0.40-0.73) |

| Study                     | Year | Number total of patients | True positive | Fluid responders | True negative | Non-fluid responders | Cut-off | Sensitivity | Specificity | AUC              |
|---------------------------|------|--------------------------|---------------|------------------|---------------|----------------------|---------|-------------|-------------|------------------|
| Ishihara et al (60)       | 2013 | 43                       | 11            | 22               | 14            | 20                   | 8.5     | 0.5         | 0.71        | 0.65(0.48-0.82)  |
| Drvar et al (61)          | 2013 | 46                       | 26            | 26               | 20            | 20                   | 8.5     | 1           | 1           | 1(0.92-1)        |
| Freitas et al (62)        | 2013 | 40                       | 17            | 19               | 10            | 11                   | 6.5     | 0.89        | 0.9         | 0.91(0.82-1)     |
| Trepte et al(63)          | 2013 | 72                       | 25            | 41               | 25            | 31                   | 6.5     | 0.61        | 0.8         | 0.70(0.21-0.85)  |
| Yang et al (64)           | 2013 | 44                       | 19            | 26               | 17            | 18                   | 15      | 0.73        | 0.94        | 0.93(0.87-0.99)  |
| Yang et al (64)           | 2013 | 44                       | 33            | 34               | 9             | 10                   | 14      | 0.97        | 0.9         | 0.96(0.91-1.00)  |
| Pei et al (69)            | 2014 | 32                       | 7             | 11               | 15            | 21                   | 10      | 0.63        | 0.71        | 0.71(0.52-0.85)  |
| Hoiseith et al (70)       | 2014 | 27                       | 10            | 10               | 16            | 17                   | 13      | 1           | 0.94        | 0.95(0.80-1.00)  |
| Guarracino et al (71)     | 2014 | 50                       | 29            | 30               | 11            | 20                   | 12.5    | 0.96        | 0.55        | 0.85(0.72-0.93)  |
| Song et al (72)           | 2014 | 40                       | 17            | 23               | 12            | 17                   | 13      | 0.74        | 0.71        | 0.75(0.59-0.91)  |
| Shim et al (73)           | 2014 | 34                       | 13            | 17               | 12            | 17                   | 12      | 0.77        | 0.71        | 0.82(0.660.93)   |
| Fisher et al (74)         | 2014 | 50                       | 34            | 41               | 7             | 9                    | 10      | 0.83        | 0.78        | 0.87(0.75-0.95)  |
| Messina et al (80)        | 2015 | 27                       | 8             | 9                | 13            | 18                   | 10      | 0.89        | 0.72        | 0.86(0.68-0.96)  |
| Zhao et al (81)           | 2015 | 25                       | 11            | 12               | 9             | 13                   | 8       | 0.91        | 0.69        | 0.87(0.68-0.97)) |
| Ibarra-Estrada et al (82) | 2015 | 59                       | 15            | 30               | 15            | 19                   | 14      | 0.5         | 0.79        | 0.63(0.49-0.75)  |
| Vistisen et al (96)       | 2016 | 41                       | 11            | 17               | 18            | 24                   | 12      | 0.65        | 0.75        | 0.57(0.39-0.75)  |
| Liu et al (95)            | 2016 | 96                       | 35            | 52               | 37            | 44                   | 10      | 0.67        | 0.84        | 0.78(0.69-0.86)  |
| de Oliveira et al (93)    | 2016 | 20                       | 8             | 9                | 11            | 11                   | 12.4    | 0.88        | 1           | 0.92±0.08        |
| Theerawit et al (87)      | 2016 | 29                       | 16            | 16               | 11            | 13                   | 13.8    | 1           | 0.84        | 0.90(0.78-1.00)  |
| Lee et al (88)            | 2016 | 40                       | 22            | 26               | 12            | 14                   | 15      | 0.86        | 0.85        | 0.81(0.77-10.00) |
| Cherpanath et al (89)     | 2016 | 22                       | 18            | 19               | 3             | 3                    | 8       | 0.95        | 1           | 0.95(0.76-0.99)  |
| Myatra et al (99)         | 2017 | 30                       | 12            | 16               | 14            | 14                   | 11.5    | 0.75        | 1           | 0.91(0.81-1.00)  |
| Yonis et al (100)         | 2017 | 19                       | 3             | 9                | 8             | 10                   | 10      | 0.33        | 0.8         | 0.49(0.21-0.77)  |
| Yonis et al (100)         | 2017 | 19                       | 7             | 9                | 4             | 10                   | 9       | 0.78        | 0.4         | 0.52(0.24-0.80)  |

| Study                | Year | Number total of patients | True positive | Fluid responders | True negative | Non-fluid responders | Cut-off | Sensitivity | Specificity | AUC             |
|----------------------|------|--------------------------|---------------|------------------|---------------|----------------------|---------|-------------|-------------|-----------------|
| Renner et al (101)   | 2017 | 39                       | 21            | 24               | 15            | 15                   | 13      | 0.87        | 1           | 0.97(0.86-0.97) |
| Renner et al (101)   | 2017 | 39                       | 22            | 24               | 14            | 15                   | 13      | 0.91        | 0.93        | 0.97(0.93-1.01) |
| Min et al (102)      | 2017 | 40                       | 12            | 19               | 17            | 21                   | 12      | 0.63        | 0.82        | 0.76(0.6-0.88)  |
| Min et al (102)      | 2017 | 40                       | 18            | 19               | 12            | 21                   | 10      | 0.94        | 0.58        | 0.84(0.69-0.94) |
| Biais et al (104)    | 2017 | 88                       | 15            | 28               | 41            | 60                   | 10      | 0.54        | 0.68        | 0.65(0.53-0.78) |
| Blais et al (103)    | 2017 | 41                       | 12            | 20               | 18            | 21                   | 9       | 0.6         | 0.86        | 0.75(0.60-0.90) |
| Messina et al (105)  | 2017 | 46                       | 15            | 19               | 22            | 26                   | 12.7    | 0.8         | 0.85        | 0.80(0.66-0.94) |
| Joosten et al (115)  | 2019 | 57                       | 19            | 26               | 23            | 31                   | 8.6     | 0.73        | 0.74        | 0.73(0.60-0.84) |
| Joosten et al (115)  | 2019 | 57                       | 16            | 26               | 23            | 31                   | 9.5     | 0.62        | 0.74        | 0.68(0.54-0.80) |
| Ali et al (116)      | 2019 | 88                       | 35            | 39               | 46            | 49                   | 12      | 0.9         | 0.94        | 0.93(0.87-0.99) |
| Ali et al (116)      | 2019 | 88                       | 24            | 39               | 46            | 49                   | 12      | 0.61        | 0.93        | 0.79(0.69-0.87) |
| He et al (117)       | 2019 | 79                       | 21            | 38               | 34            | 41                   | 8.5     | 0.55        | 0.83        | 0.79(0.70-0.89) |
| He et al (117)       | 2019 | 79                       | 29            | 38               | 38            | 41                   | 12.5    | 0.76        | 0.93        | 0.91(0.85-0.98) |
| He et al (117)       | 2019 | 79                       | 33            | 38               | 36            | 41                   | 15.5    | 0.87        | 0.9         | 0.93(0.88-0.99) |
| Ali et al (118)      | 2019 | 33                       | 14            | 15               | 8             | 18                   | 10      | 0.93        | 0.44        | 0.68(0.49-0.83) |
| Jun et al (126)      | 2019 | 38                       | 13            | 24               | 11            | 14                   | 6       | 0.54        | 0.79        | 0.69(0.52-0.83) |
| Jun et al (126)      | 2019 | 38                       | 18            | 24               | 11            | 14                   | 7       | 0.79        | 0.79        | 0.85(0.70-0.95) |
| Lee et al (127)      | 2020 | 50                       | 21            | 30               | 12            | 20                   | 8       | 0.7         | 0.6         | 0.71(0.57-0.86) |
| Wang et al (128)     | 2020 | 44                       | 20            | 24               | 15            | 20                   | 25.8    | 0.83        | 0.75        | 0.84(0.72-0.95) |
| Bapteste et al (129) | 2020 | 31                       | 11            | 13               | 15            | 18                   | 8       | 0.83        | 0.83        | 0.87(0.72-1.00) |
| Chen et al (141)     | 2021 | 27                       | 16            | 16               | 6             | 11                   | 3.2     | 1           | 0.54        | 0.81(0.61-0.93) |
| Chen et al (141)     | 2021 | 27                       | 12            | 16               | 7             | 11                   | 3.2     | 0.75        | 0.63        | 0.67(0.46-0.84) |
| Chen et al (141)     | 2021 | 27                       | 12            | 16               | 10            | 11                   | 3.2     | 0.75        | 0.91        | 0.85(0.66-0.96) |
| Watanabe et al(140)  | 2021 | 30                       | 11            | 13               | 6             | 17                   | 10      | 0.84        | 0.35        | 0.55(0.35-0.73) |
| Shi et al (144)      | 2021 | 84                       | 31            | 42               | 33            | 42                   | 6.5     | 0.74        | 0.79        | 0.85(0.77-0.92) |



| Study               | Year | Number total of patients | True positive | Fluid responders | True negative | Non-fluid responders | Cut-off | Sensitivity | Specificity | AUC             |
|---------------------|------|--------------------------|---------------|------------------|---------------|----------------------|---------|-------------|-------------|-----------------|
| Messina et al (139) | 2021 | 103                      | 29            | 53               | 45            | 50                   | 10.8    | 0.54        | 0.9         | 0.77(0.67-0.84) |
| Xu et al (147)      | 2021 | 76                       | 22            | 31               | 29            | 45                   | 7       | 0.71        | 0.64        | 0.69(0.57-0.79) |
| Xu et al (147)      | 2021 | 76                       | 25            | 31               | 38            | 45                   | 11      | 0.8         | 0.84        | 0.90(0.81-0.96) |
| Elsayed et al (143) | 2021 | 46                       | 14            | 16               | 25            | 30                   | 10.5    | 0.87        | 0.83        | 0.87(0.76-0.97) |

**Table S2. Operative performance of pulse pressure variation for prediction of fluid responsiveness from included studies.** Values are expressed as pooled values (95% confidence interval) or median (IQR). AUC, area under curve reported by each study; NE, not reported.

| Study                      | Year | Number total of patients | True positive | Fluid responders | True negative | Non-fluid responders | Cut-off | Sensitivity | Specificity | AUC             |
|----------------------------|------|--------------------------|---------------|------------------|---------------|----------------------|---------|-------------|-------------|-----------------|
| Berkenstadt et al (2)      | 2001 | 140                      | 55            | 70               | 65            | 70                   | 9.5     | 0.78        | 0.932       | 0.87(0.80-0.90) |
| Hofer et al (6)            | 2005 | 35                       | 16            | 21               | 10            | 14                   | 12.5    | 0.74        | 0.71        | 0.82(0.67-0.96) |
| de Wall et al (19)         | 2009 | 22                       | 11            | 11               | 9             | 11                   | 8       | 1           | 0.78        | 0.91±0.07       |
| Lahner et al (24)          | 2009 | 26                       | 13            | 20               | 4             | 6                    | 8.5     | 0.65        | 0.67        | 0.58(0.23-0.82) |
| Lahner et al (24)          | 2009 | 41                       | 27            | 32               | 2             | 9                    | 8.5     | 0.85        | 0.25        | 0.44(0.23-0.70) |
| Cannesson et al (20)       | 2009 | 25                       | 14            | 17               | 7             | 8                    | 10      | 0.82        | 0.88        | 0.87±0.08       |
| Monge et al (21)           | 2009 | 38                       | 15            | 19               | 17            | 19                   | 11      | 0.79        | 0.89        | 0.89±0.06       |
| Zimmermann et al (30)      | 2010 | 20                       | 15            | 15               | 4             | 5                    | 11      | 1           | 0.8         | 0.99            |
| Biais et al (29)           | 2010 | 27                       | 14            | 16               | 10            | 11                   | 9       | 0.88        | 0.91        | 0.93(0.76-0.99) |
| Biais et al (29)           | 2010 | 27                       | 16            | 17               | 8             | 10                   | 14      | 0.94        | 0.8         | 0.93(0.77-0.99) |
| Machare-Delgado et al (35) | 2011 | 25                       | 4             | 8                | 11            | 17                   | 12      | 0.5         | 0.65        | 0.57            |
| Geerts et al (33)          | 2011 | 24                       | 14            | 17               | 6             | 7                    | 8.8     | 0.82        | 0.86        | 0.74(0.54-0.90) |
| Geerts et al (38)          | 2011 | 20                       | 7             | 10               | 10            | 10                   | 7.3     | 0.70        | 1           | 0.90(0.76-1.00) |
| Broch et al (37)           | 2011 | 81                       | 29            | 45               | 27            | 36                   | 12      | 0.64        | 0.75        | 0.72(0.61-0.88) |
| Fellahi et al (41)         | 2012 | 25                       | 17            | 21               | 3             | 4                    | 11      | 0.81        | 0.75        | 0.89(0.74-1.04) |
| Khwannimit et al (43)      | 2012 | 42                       | 22            | 24               | 15            | 18                   | 10      | 0.91        | 0.83        | 0.92(0.83-1.00) |
| Cecconi et al (46)         | 2012 | 31                       | 15            | 20               | 9             | 11                   | 12.5    | 0.75        | 0.83        | 0.84(0.71-0.96) |
| Monnet et al (45)          | 2012 | 39                       | 13            | 17               | 18            | 22                   | 14      | 0.76        | 0.82        | 0.84(0.71-0.97) |
| Fu et al (50)              | 2012 | 51                       | 27            | 31               | 17            | 20                   | 12.5    | 0.87        | 0.83        | 0.86(0.76-0.96) |
| J Li et al (51)            | 2012 | 157                      | 88            | 108              | 41            | 49                   | 11.5    | 0.81        | 0.83        | 0.88±0.03       |
| Biais et al (49)           | 2012 | 35                       | 12            | 19               | 11            | 16                   | 12.6    | 0.63        | 0.69        | 0.60(0.43-0.76) |
| Broch et al(54)            | 2012 | 92                       | 34            | 53               | 30            | 39                   | 11      | 0.64        | 0.76        | 0.77(0.61-0.87) |
| Davies et al (57)          | 2013 | 96                       | 30            | 35               | 30            | 61                   | 10      | 0.85        | 0.5         | 0.64(0.52-0.78) |
| Davies et al (57)          | 2013 | 96                       | 28            | 35               | 23            | 61                   | 10      | 0.8         | 0.38        | 0.57(0.43-0.72) |
| Fischer et al (59)         | 2013 | 37                       | 8             | 27               | 9             | 10                   | 16      | 0.3         | 0.9         | 0.50(0.33-0.67) |

| Study                     | Year | Number total of patients | True positive | Fluid responders | True negative | Non-fluid responders | Cut-off | Sensitivity | Specificity | AUC             |
|---------------------------|------|--------------------------|---------------|------------------|---------------|----------------------|---------|-------------|-------------|-----------------|
| Ishihara et al (60)       | 2013 | 43                       | 10            | 22               | 16            | 20                   | 10.5    | 0.45        | 0.81        | 0.60(0.43-0.78) |
| Kim et al (65)            | 2013 | 33                       | 16            | 21               | 8             | 12                   | 13      | 0.76        | 0.67        | 0.80(0.65-0.95) |
| Nordstrom et al (58)      | 2013 | 86                       | 21            | 27               | 37            | 59                   | 8.5     | 0.79        | 0.63        | 0.66(0.52-0.79) |
| Trepte et al(63)          | 2013 | 72                       | 26            | 41               | 23            | 31                   | 9.9     | 0.63        | 0.74        | 0.72(0.21-0.85) |
| Monnet et al (55)         | 2013 | 35                       | 14            | 15               | 18            | 20                   | 10      | 0.93        | 0.9         | 0.89±0.07       |
| Drvar et al (61)          | 2013 | 46                       | 25            | 26               | 20            | 20                   | 10      | 0.96        | 1           | 0.96(0.85-0.99) |
| Kim et al (65)            | 2013 | 33                       | 16            | 21               | 8             | 12                   | 13      | 0.76        | 0.67        | 0.80(0.65-0.95) |
| Pei et al (69)            | 2014 | 32                       | 5             | 11               | 18            | 21                   | 10      | 0.45        | 0.85        | 0.69(0.51-0.84) |
| Hoiseh et al (70)         | 2014 | 31                       | 10            | 12               | 17            | 19                   | 12      | 0.83        | 0.89        | 0.90(0.74-0.98) |
| Kurts et al (75)          | 2014 | 57                       | 20            | 27               | 24            | 30                   | 9       | 0.75        | 0.8         | 0.86(0.75-0.96) |
| Guinot et al (78)         | 2014 | 42                       | 26            | 28               | 12            | 14                   | 13      | 0.93        | 0.86        | 0.89(0.76-0.97) |
| Kang et at (77)           | 2014 | 54                       | 24            | 27               | 24            | 27                   | 13.5    | 0.88        | 0.88        | 0.90(0.80-0.99) |
| Kang et at (77)           | 2014 | 54                       | 25            | 27               | 23            | 27                   | 13.5    | 0.92        | 0.84        | 0.93(0.83-1.00) |
| Kang et at (77)           | 2014 | 54                       | 25            | 27               | 25            | 27                   | 13.5    | 0.92        | 0.92        | 0.94(0.86-1.00) |
| Kang et at (77)           | 2014 | 54                       | 23            | 27               | 24            | 27                   | 13.5    | 0.84        | 0.88        | 0.90(0.80-0.99) |
| Kang et at (77)           | 2014 | 54                       | 25            | 27               | 23            | 27                   | 13.5    | 0.92        | 0.84        | 0.93(0.83-1.00) |
| Kang et at (77)           | 2014 | 54                       | 25            | 27               | 25            | 27                   | 13.5    | 0.92        | 0.92        | 0.94(0.86-1.00) |
| Zhao et al (81)           | 2015 | 25                       | 12            | 12               | 12            | 13                   | 10      | 1           | 0.92        | 0.95(0.78-0.99) |
| Ibarra-Estrada et al (82) | 2015 | 59                       | 23            | 30               | 13            | 19                   | 16      | 0.76        | 0.68        | 0.72(0.59-0.83) |
| Angappan et al (83)       | 2015 | 45                       | 23            | 29               | 14            | 16                   | 13      | 0.78        | 0.89        | 0.71(0.56-0.84) |
| Zhang et al (90)          | 2016 | 40                       | 22            | 26               | 13            | 14                   | 15.5    | 0.84        | 0.92        | 0.93(0.85-1.00) |
| Cherpanath et al (89)     | 2016 | 22                       | 17            | 19               | 3             | 3                    | 9       | 0.89        | 1           | 0.95(0.76-0.99) |
| Theerawit et al (87)      | 2016 | 29                       | 13            | 16               | 10            | 13                   | 12.5    | 0.81        | 0.76        | 0.81(0.64-0.98) |
| Lee et al (88)            | 2016 | 40                       | 24            | 26               | 8             | 14                   | 12      | 0.92        | 0.57        | 0.83(0.65-0.94) |
| Min et al (102)           | 2017 | 40                       | 14            | 19               | 14            | 21                   | 12      | 0.74        | 0.67        | 0.78(0.62-0.90) |

| Study                    | Year | Number total of patients | True positive | Fluid responders | True negative | Non-fluid responders | Cut-off | Sensitivity | Specificity | AUC             |
|--------------------------|------|--------------------------|---------------|------------------|---------------|----------------------|---------|-------------|-------------|-----------------|
| Min et al (102)          | 2017 | 40                       | 13            | 19               | 17            | 21                   | 12      | 0.68        | 0.81        | 0.79(0.63-0.90) |
| Myatra et al (99)        | 2017 | 30                       | 12            | 16               | 13            | 14                   | 10.5    | 0.75        | 0.93        | 0.92(0.82-1.00) |
| Lu et al (106)           | 2017 | 49                       | 20            | 27               | 19            | 22                   | 11.5    | 0.75        | 0.85        | 0.85(0.72-0.96) |
| Guo-Guang Ma et al (111) | 2018 | 70                       | 32            | 35               | 33            | 35                   | 12      | 0.91        | 0.94        | 0.97(0.89-0.99) |
| Jun et al (126)          | 2019 | 38                       | 16            | 24               | 11            | 14                   | 5       | 0.67        | 0.79        | 0.69(0.52-0.83) |
| Xu et al (119)           | 2019 | 75                       | 26            | 36               | 25            | 39                   | 12      | 0.72        | 0.64        | 0.75(0.64-0.86) |
| Ali et al (118)          | 2019 | 33                       | 13            | 15               | 9             | 18                   | 10      | 0.87        | 0.5         | 0.70(0.52-0.85) |
| Lee et al (127)          | 2020 | 50                       | 26            | 30               | 12            | 20                   | 5       | 0.87        | 0.6         | 0.72(0.57-0.87) |
| Wang et al (128)         | 2020 | 44                       | 16            | 24               | 19            | 20                   | 9       | 0.66        | 0.95        | 0.80(0.66-0.94) |
| Bubenek et al (130)      | 2020 | 266                      | 190           | 243              | 23            | 23                   | 8       | 0.78        | 1           | 0.89(0.85-0.93) |
| Kaur et al (136)         | 2021 | 67                       | 28            | 45               | 21            | 22                   | 9       | 0.62        | 0.81        | NR              |
| Chen et al (141)         | 2021 | 27                       | 15            | 16               | 6             | 11                   | 6       | 1           | 0.54        | 0.75(0.55-0.90) |
| Chen et al (141)         | 2021 | 27                       | 8             | 16               | 11            | 11                   | 6       | 0.5         | 1           | 0.79(0.59-0.92) |
| Chen et al (141)         | 2021 | 27                       | 10            | 16               | 11            | 11                   | 6       | 0.62        | 1           | 0.76(0.55-0.90) |
| Watanabe et al(140)      | 2021 | 30                       | 5             | 13               | 14            | 17                   | 6.29    | 0.38        | 0.82        | 0.61(0.41-0.78) |
| Messina et al (139)      | 2021 | 103                      | 26            | 53               | 42            | 50                   | 7       | 0.49        | 0.84        | 0.71(0.61-0.80) |
| Abdullah et al(146)      | 2022 | 55                       | 12            | 25               | 28            | 30                   | 6.6     | 0.46        | 0.92        | 0.74(0.61-0.85) |

**Table S3. Operative performance of stroke volume variation of fluid responsiveness from included studies.** Values are expressed as pooled values (95% confidence interval) or median (IQR). AUC, area under curve reported by each study, NR, not reported.

| Study                 | Year | Number total of patients | True positive | Fluid responders | True negative | Non-fluid responders | Cut-off | Sensitivity | Specificity | AUC             |
|-----------------------|------|--------------------------|---------------|------------------|---------------|----------------------|---------|-------------|-------------|-----------------|
| Lafanechere et al (7) | 2006 | 22                       | 9             | 10               | 10            | 12                   | 8       | 0.9         | 0.83        | 0.95±0.04       |
| Monnet et al (8)      | 2006 | 71                       | 36            | 37               | 32            | 34                   | 10      | 0.97        | 0.94        | 0.91±0.06       |
| Monnet et al (8)      | 2006 | 71                       | 22            | 37               | 27            | 34                   | 12      | 0.6         | 0.85        | 0.75±0.06       |
| Maizel et al (13)     | 2007 | 34                       | 11            | 17               | 15            | 17                   | 12      | 0.63        | 0.89        | 0.89±0.06       |
| Maizel et al (13)     | 2007 | 34                       | 12            | 17               | 15            | 17                   | 12      | 0.69        | 0.89        | 0.90±0.06       |
| Lamia et al (14)      | 2007 | 24                       | 10            | 13               | 11            | 11                   | 12.5    | 0.77        | 1           | NR              |
| Lamia et al (14)      | 2007 | 24                       | 16            | 16               | 8             | 8                    | 8       | 1           | 1           | NR              |
| Monnet et al (27)     | 2009 | 34                       | 21            | 23               | 11            | 11                   | 10      | 0.91        | 1           | 0.93(0.79-0.99) |
| Monnet et al (27)     | 2009 | 34                       | 11            | 23               | 10            | 11                   | 11      | 0.48        | 0.91        | 0.67(0.49-0.80) |
| Biais et al (25)      | 2009 | 30                       | 20            | 20               | 8             | 10                   | 13      | 1           | 0.8         | 0.96±0.03       |
| Biais et al (25)      | 2009 | 30                       | 17            | 20               | 9             | 10                   | 16      | 0.85        | 0.9         | 0.92±0.05       |
| Thiel et at (26)      | 2009 | 102                      | 38            | 47               | 51            | 55                   | 15      | 0.81        | 0.93        | 0.89±0.04       |
| Préau et al (31)      | 2010 | 34                       | 12            | 14               | 18            | 20                   | 10      | 0.86        | 0.9         | 0.94±0.04       |
| Préau et al (31)      | 2010 | 34                       | 11            | 14               | 17            | 20                   | 9       | 0.79        | 0.85        | 0.86±0.08       |
| Préau et al (31)      | 2010 | 34                       | 12            | 14               | 16            | 20                   | 8       | 0.86        | 0.8         | 0.93±0.04       |
| Huang et al (36)      | 2011 | 30                       | 13            | 15               | 14            | 15                   | 11      | 0.86        | 0.93        | 0.94±0.03       |
| Dong et al (52)       | 2012 | 32                       | 15            | 22               | 8             | 10                   | 8.8     | 0.72        | 0.8         | 0.86±0.06       |
| Dong et al (52)       | 2012 | 32                       | 16            | 22               | 8             | 10                   | 12.7    | 0.72        | 0.8         | 0.80±0.07       |
| Monge et al (53)      | 2012 | 37                       | 20            | 21               | 15            | 16                   | 12      | 0.95        | 0.93        | 0.97±0.03       |
| Monge et al (53)      | 2012 | 37                       | 19            | 21               | 15            | 16                   | 5       | 0.9         | 0.93        | 0.94±0.03       |
| Monge et al (53)      | 2012 | 37                       | 14            | 21               | 13            | 16                   | 11      | 0.66        | 81.2        | 0.73±0.09       |
| Fellahi et al (41)    | 2012 | 25                       | 7             | 14               | 10            | 11                   | 6       | 0.5         | 0.91        | 0.72(0.50-0.88) |
| Fellahi et al (42)    | 2012 | 25                       | 13            | 14               | 8             | 11                   | 3       | 0.93        | 0.73        | 0.81(0.62-0.94) |
| Monnet et al (45)     | 2012 | 39                       | 17            | 17               | 20            | 22                   | 11      | 1           | 0.91        | 0.95(0.88-1.03) |
| Monnet et al (44)     | 2012 | 26                       | 14            | 15               | 10            | 11                   | 10      | 0.93        | 0.91        | 0.91±0.06       |

| Study                         | Year | Number total of patients | True positive | Fluid responders | True negative | Non-fluid responders | Cut-off | Sensitivity | Specificity | AUC             |
|-------------------------------|------|--------------------------|---------------|------------------|---------------|----------------------|---------|-------------|-------------|-----------------|
| Monnet et al (44)             | 2012 | 28                       | 14            | 15               | 13            | 13                   | 10      | 0.94        | 1           | 0.94±0.05       |
| Monnet et al (56)             | 2013 | 40                       | 20            | 21               | 18            | 19                   | 10      | 0.95        | 0.95        | 0.98(0.88-1.00) |
| Monnet et al (56)             | 2013 | 40                       | 15            | 21               | 19            | 19                   | 5       | 0.71        | 1           | 0.93(0.81-0.99) |
| Saugel et al (66)             | 2013 | 24                       | 5             | 7                | 4             | 17                   | 15      | 0.71        | 0.23        | NR              |
| Saugel et al (66)             | 2013 | 24                       | 3             | 7                | 14            | 17                   | 15      | 0.42        | 0.82        | NR              |
| Saugel et al (66)             | 2013 | 24                       | 7             | 7                | 3             | 17                   | 15      | 1           | 0.17        | NR              |
| Kupersztych-Hagege et al (67) | 2013 | 48                       | 16            | 19               | 28            | 29                   | 9       | 0.84        | 0.97        | 0.87±0.06       |
| Ibarra-Estrada et al (82)     | 2015 | 59                       | 19            | 30               | 14            | 19                   | 15      | 0.63        | 0.72        | 0.69(0.56-0.80) |
| Airapetian et al (84)         | 2015 | 59                       | 9             | 29               | 29            | 30                   | 42      | 0.31        | 0.97        | 0.62±0.07       |
| Airapetian et al (84)         | 2015 | 59                       | 27            | 29               | 10            | 30                   | 2.1     | 0.93        | 0.33        | 0.62±0.07       |
| Airapetian et al (84)         | 2015 | 59                       | 15            | 29               | 26            | 30                   | 10      | 0.52        | 0.87        | 0.78±0.06       |
| Fisher et al (91)             | 2016 | 78                       | 42            | 55               | 13            | 23                   | 3       | 0.76        | 0.57        | 0.67(0.55-0.77) |
| Kim et al (92)                | 2016 | 43                       | 11            | 15               | 22            | 28                   | 7.3     | 0.71        | 0.79        | 0.77(0.61-0.92) |
| Sobczyk et al (94)            | 2016 | 35                       | 19            | 24               | 9             | 11                   | 15      | 0.79        | 0.81        | 0.8             |
| Kridge et al (98)             | 2016 | 33                       | 8             | 10               | 21            | 23                   | 9       | 0.8         | 0.91        | 0.85(0.63-1.00) |
| Renner et al (109)            | 2017 | 46                       | 17            | 21               | 18            | 25                   | 11      | 0.81        | 0.72        | 0.86(0.75-0.96) |
| Renner et al (109)            | 2017 | 46                       | 16            | 21               | 18            | 25                   | 8       | 0.76        | 0.72        | 0.78(0.65-0.92) |
| El Hadouti et al (107)        | 2017 | 41                       | 21            | 22               | 10            | 19                   | 5       | 0.95        | 0.52        | NR              |
| El Hadouti et al (107)        | 2017 | 41                       | 22            | 22               | 9             | 19                   | 5       | 1           | 0.47        | NR              |
| El Hadouti et al (107)        | 2017 | 41                       | 19            | 22               | 12            | 19                   | 8       | 0.86        | 0.63        | NR              |
| El Hadouti et al (107)        | 2017 | 41                       | 21            | 22               | 12            | 19                   | 8       | 0.95        | 0.63        | NR              |
| El Hadouti et al (107)        | 2017 | 41                       | 18            | 22               | 16            | 19                   | 10      | 0.81        | 0.84        | NR              |
| El Hadouti et al (107)        | 2017 | 41                       | 17            | 22               | 16            | 19                   | 10      | 0.77        | 0.84        | NR              |

| Study                  | Year | Number total of patients | True positive | Fluid responders | True negative | Non-fluid responders | Cut-off | Sensitivity | Specificity | AUC             |
|------------------------|------|--------------------------|---------------|------------------|---------------|----------------------|---------|-------------|-------------|-----------------|
| El Hadouti et al (107) | 2017 | 41                       | 18            | 22               | 17            | 19                   | 11      | 0.81        | 0.89        | NR              |
| El Hadouti et al (107) | 2017 | 41                       | 15            | 22               | 19            | 19                   | 11      | 0.68        | 1           | NR              |
| El Hadouti et al (107) | 2017 | 41                       | 15            | 22               | 17            | 19                   | 12      | 0.68        | 0.89        | NR              |
| El Hadouti et al (107) | 2017 | 41                       | 14            | 22               | 19            | 19                   | 12      | 0.63        | 1           | NR              |
| Ma et al (111)         | 2017 | 70                       | 35            | 35               | 29            | 35                   | 12.84   | 1           | 0.82        | 0.91(0.82-0.97) |
| Wu et al (112)         | 2017 | 62                       | 25            | 28               | 30            | 34                   | 12.45   | 0.89        | 0.88        | 0.92            |
| Wu et al (112)         | 2017 | 62                       | 23            | 28               | 30            | 34                   | 10.6    | 0.82        | 0.88        | 0.89            |
| Xu et al (110)         | 2017 | 34                       | 14            | 14               | 19            | 20                   | 10      | 1           | 0.95        | 0.96(0.84-0.99) |
| Xu et al (110)         | 2017 | 34                       | 13            | 14               | 15            | 20                   | 10      | 0.93        | 0.75        | 0.86(0.70-0.95) |
| Si et al (113)         | 2018 | 40                       | 24            | 26               | 12            | 14                   | 12      | 0.92        | 0.86        | 0.94±0.03       |
| Si et al (113)         | 2018 | 40                       | 21            | 26               | 12            | 14                   | 7       | 0.81        | 0.86        | 0.85±0.06       |
| Si et al (113)         | 2018 | 40                       | 18            | 26               | 11            | 14                   | 5       | 0.69        | 0.78        | 0.77±0.07       |
| Si et al (113)         | 2018 | 40                       | 16            | 26               | 10            | 14                   | 7       | 0.69        | 0.72        | 0.76±0.07       |
| Si et al (113)         | 2018 | 40                       | 16            | 26               | 11            | 14                   | 5       | 0.62        | 0.79        | 0.62±0.09       |
| Trifi et al (120)      | 2019 | 30                       | 18            | 19               | 8             | 11                   | 15      | 0.94        | 0.72        | 0.84±0.04       |
| Beurton et al (121)    | 2019 | 30                       | 14            | 15               | 15            | 15                   | 10      | 0.93        | 1           | 0.98±0.02       |
| Hou et al (131)        | 2020 | 102                      | 33            | 53               | 37            | 49                   | 17      | 0.62        | 0.75        | 0.73(0.63-0.81) |
| Hou et al (131)        | 2020 | 102                      | 31            | 53               | 43            | 49                   | 21      | 0.58        | 0.87        | 0.75(0.65-0.83) |
| Hou et al (131)        | 2020 | 102                      | 42            | 53               | 24            | 49                   | 4       | 0.79        | 0.48        | 0.65(0.55-0.74) |
| Beurton et al (125)    | 2019 | 72                       | 31            | 34               | 30            | 38                   | 9       | 0.91        | 0.79        | 0.89(0.80-0.95) |
| Hou et al (131)        | 2019 | 102                      | 44            | 53               | 26            | 49                   | 7       | 0.83        | 0.53        | 0.70(0.60-0.79) |
| Bataille et al (137)   | 2021 | 100                      | 30            | 50               | 42            | 50                   | 10      | 0.61        | 0.85        | 0.77(0.64-0.91) |
| Taccheri et al (142)   | 2021 | 30                       | 15            | 15               | 14            | 15                   | <20%    | 1           | 0.93        | 0.98±0.02       |
| Taccheri et al (142)   | 2021 | 30                       | 14            | 15               | 14            | 15                   | < - 2   | 0.93        | 0.93        | 0.98±0.03       |

| Study                | Year | Number total of patients | True positive | Fluid responders | True negative | Non-fluid responders | Cut-off | Sensitivity | Specificity | AUC             |
|----------------------|------|--------------------------|---------------|------------------|---------------|----------------------|---------|-------------|-------------|-----------------|
| Taccheri et al (142) | 2021 | 30                       | 12            | 15               | 15            | 15                   | <19%    | 0.8         | 1           | 0.98±0.04       |
| Taccheri et al (142) | 2021 | 30                       | 11            | 15               | 15            | 15                   | <-2     | 0.73        | 1           | 0.98±0.05       |
| Hamzaoui et al (134) | 2021 | 54                       | 19            | 22               | 22            | 32                   | -1      | 0.87        | 0.68        | 0.78(0.65-0.88) |
| Taccheri et al (142) | 2021 | 30                       | 15            | 15               | 10            | 15                   | > 4%    | 1           | 0.67        | 0.98±0.06       |
| Taccheri et al (142) | 2021 | 30                       | 15            | 15               | 11            | 15                   | > 1     | 1           | 0.6         | 0.98±0.07       |
| Giraud et al (135)   | 2021 | 33                       | 14            | 15               | 17            | 18                   | 4       | 0.93        | 0.94        | 0.92±0.05       |
| Elsayed et al (143)  | 2021 | 46                       | 14            | 16               | 24            | 30                   | 2.5     | 0.87        | 0.8         | 0.87(0.77-0.98) |
| Elsayed et al (143)  | 2021 | 46                       | 15            | 16               | 26            | 30                   | 6.5     | 0.93        | 0.86        | 0.94(0.88-1.00) |
| Shi et al (145)      | 2022 | 35                       | 10            | 14               | 16            | 21                   | 2       | 0.71        | 0.76        | 0.76(0.59-0.89) |
| Mallat et al (148)   | 2022 | 270                      | 148           | 164              | 94            | 106                  | -18.2   | 0.9         | 0.88        | 0.92(0.88-0.95) |
| Mallat et al (148)   | 2022 | 270                      | 147           | 164              | 93            | 106                  | -2      | 0.89        | 0.87        | 0.92(0.88-0.95) |

**Table S4. Operative performance of passive leg raising of fluid responsiveness from included studies.** Values are expressed as pooled values (95% confidence interval) or median (IQR). AUC. area under curve reported by each study; NR, not reported.



| Study               | Year | Number total of patients | True positive | Fluid responders | True negative | Non-fluid responders | Cut-off | Sensitivity | Specificity | AUC             |
|---------------------|------|--------------------------|---------------|------------------|---------------|----------------------|---------|-------------|-------------|-----------------|
| Monnet et al (27)   | 2009 | 34                       | 20            | 23               | 11            | 11                   | 5       | 0.87        | 1           | 0.95(0.82-0.99) |
| Monnet et al (27)   | 2009 | 34                       | 21            | 23               | 11            | 11                   | 5       | 0.91        | 1           | 0.97(0.84-0.99) |
| Monnet et al (27)   | 2009 | 34                       | 15            | 23               | 9             | 11                   | 4       | 0.67        | 0.82        | 0.71(0.52-0.85) |
| Monnet et al (45)   | 2012 | 39                       | 17            | 17               | 20            | 22                   | 5       | 1           | 0.91        | 0.97(0.91-1.03) |
| Monnet et al (44)   | 2012 | 26                       | 14            | 15               | 10            | 11                   | 5       | 0.93        | 0.91        | 0.97±0.03       |
| Monnet et al (44)   | 2012 | 28                       | 14            | 15               | 12            | 13                   | 5       | 0.93        | 0.92        | 0.93±0.05       |
| Silva et al(68)     | 2013 | 34                       | 9             | 10               | 21            | 24                   | 5       | 0.9         | 0.88        | 0.90(0.75-0.98) |
| Silva et al(68)     | 2013 | 34                       | 13            | 13               | 19            | 21                   | 6       | 1           | 0.9         | 0.96(0.82-0.99) |
| Guinot et al (78)   | 2014 | 42                       | 23            | 28               | 10            | 14                   | 13      | 0.82        | 0.71        | 0.78(0.63-0.89) |
| Guinot et al (78)   | 2014 | 42                       | 23            | 28               | 8             | 14                   | 13      | 0.82        | 0.57        | 0.68(0.51-0.81) |
| Myatra et al (99)   | 2017 | 30                       | 14            | 16               | 13            | 14                   | 4.1     | 0.88        | 0.93        | 0.95(0.88-1.00) |
| Yonis et al (100)   | 2017 | 33                       | 5             | 15               | 19            | 19                   | 10      | 0.33        | 1           | 0.65(0.46-0.84) |
| Jozwiak et al (108) | 2017 | 30                       | 14            | 15               | 15            | 15                   | 4       | 0.93        | 1           | 0.98(0.85-1.00) |
| Jozwiak et al (108) | 2017 | 30                       | 14            | 15               | 15            | 15                   | 5       | 0.93        | 1           | 0.93(0.78-0.99) |
| Blais et al (103)   | 2017 | 41                       | 20            | 20               | 17            | 21                   | 5       | 1           | 0.81        | 0.91(0.81-1.00) |
| Blais et al (103)   | 2017 | 41                       | 11            | 20               | 15            | 21                   | 1       | 0.55        | 0.71        | 0.44-0.80)      |
| Georges et al (114) | 2018 | 50                       | 25            | 28               | 21            | 22                   | 9       | 0.89        | 0.95        | 0.96±0.03       |
| Georges et al (114) | 2018 | 50                       | 18            | 28               | 17            | 22                   | 8.5     | 0.64        | 0.77        | 0.70±0.07       |
| Depret el at (122)  | 2019 | 28                       | 12            | 14               | 13            | 14                   | 3       | 0.86        | 0.93        | 0.95(0.79-0.99) |
| Depret el at (122)  | 2019 | 28                       | 14            | 14               | 14            | 14                   | 4       | 1           | 1           | 1(0.88-1.00)    |
| Depret el at (122)  | 2019 | 28                       | 10            | 14               | 12            | 14                   | 3       | 0.71        | 0.86        | 0.80(0.61-0.93) |
| Depret el at (122)  | 2019 | 28                       | 10            | 14               | 12            | 14                   | 2       | 0.71        | 0.86        | 0.75(0.55-0.89) |
| Messina et al (123) | 2019 | 40                       | 19            | 21               | 16            | 19                   | 3.6     | 0.89        | 0.85        | 0.93(0.84-1.00) |

| Study               | Year | Number total of patients | True positive | Fluid responders | True negative | Non-fluid responders | Cut-off | Sensitivity | Specificity | AUC             |
|---------------------|------|--------------------------|---------------|------------------|---------------|----------------------|---------|-------------|-------------|-----------------|
| Messina et al (123) | 2019 | 40                       | 19            | 21               | 16            | 19                   | 4.7     | 0.89        | 0.85        | 0.95(0.88-1.00) |
| Xu et al (119)      | 2019 | 75                       | 29            | 36               | 36            | 39                   | 5       | 0.8         | 0.92        | 0.90(0.83-0.97) |
| Xu et al (119)      | 2019 | 75                       | 11            | 36               | 37            | 39                   | 3       | 0.31        | 0.94        | 0.75(0.63-0.86) |
| Xu et al (119)      | 2019 | 75                       | 22            | 36               | 29            | 39                   | 5       | 0.6         | 0.74        | 0.71(0.59-0.83) |
| Weil et al (132)    | 2020 | 65                       | 15            | 25               | 27            | 40                   | 10      | 0.6         | 0.67        | 0.70(0.57-0.81) |
| Weil et al (132)    | 2020 | 50                       | 13            | 19               | 25            | 31                   | 14      | 0.68        | 0.8         | 0.78(0.64-0.89) |
| Lizuka et al (138)  | 2021 | 41                       | 10            | 16               | 17            | 25                   | 1.02    | 0.64        | 0.68        | 0.56(0.37-0.74) |
| Lizuka et al (138)  | 2021 | 41                       | 10            | 16               | 20            | 25                   | 1.04    | 0.6         | 0.81        | 0.68(0.52-0.85) |
| Lizuka et al (138)  | 2021 | 41                       | 10            | 16               | 17            | 25                   | 1       | 0.6         | 0.68        | 0.61(0.42-0.80) |
| Lizuka et al (138)  | 2021 | 41                       | 8             | 16               | 14            | 25                   | 1       | 0.52        | 0.56        | 0.42(0.24-0.60) |
| Messina et al (139) | 2021 | 102                      | 46            | 53               | 22            | 49                   | 3.4     | 0.85        | 0.45        | 0.67(0.57-0.76) |
| Messina et al (139) | 2021 | 103                      | 49            | 53               | 23            | 50                   | 3.4     | 0.92        | 0.45        | 0.73(0.63-0.81) |
| Shi et al (144)     | 2022 | 84                       | 37            | 42               | 39            | 42                   | 3.2     | 0.88        | 0.93        | 0.93(0.87-0.98) |

**Table S5. Operative performance of end-expiratory occlusion test of fluid responsiveness from included studies.** Values are expressed as pooled values (95% confidence interval) or median (IQR). AUC, area under curve reported by each study, NR, not reported.

| Study               | Year | Number total of patients | True positive | Fluid responders | True negative | Non-fluid responders | Cut-off | Sensitivity | Specificity | AUC             |
|---------------------|------|--------------------------|---------------|------------------|---------------|----------------------|---------|-------------|-------------|-----------------|
| Muller et al (40)   | 2011 | 39                       | 20            | 21               | 14            | 18                   | 10      | 0.95        | 0.78        | NR              |
| Wu et al (79)       | 2014 | 50                       | 20            | 27               | 22            | 23                   | 9       | 0.74        | 0.95        | 0.91±0.04       |
| Wu et al (79)       | 2014 | 50                       | 25            | 27               | 21            | 23                   | 6       | 0.93        | 0.91        | 0.95±0.03       |
| Wu et al (79)       | 2014 | 50                       | 27            | 27               | 23            | 23                   | 10      | 1           | 1           | 0.96±0.03       |
| Guinot et al (85)   | 2015 | 73                       | 24            | 27               | 41            | 46                   | 7       | 0.89        | 0.89        | 0.93(0.84-0.97) |
| Mallat et al (86)   | 2015 | 49                       | 17            | 22               | 20            | 27                   | 5.2     | 0.77        | 0.74        | 0.78(0.68-0.88) |
| Mallat et al (86)   | 2015 | 49                       | 19            | 22               | 24            | 27                   | -2      | 0.86        | 0.89        | 0.91(0.80-0.97) |
| Mallat et al (86)   | 2015 | 49                       | 19            | 22               | 23            | 27                   | -2      | 0.86        | 0.85        | 0.92(0.81-0.98) |
| Lagrece et al (97)  | 2016 | 40                       | 5             | 15               | 25            | 25                   | 3       | 0.33        | 1           | 0.74(0.67-0.97) |
| Biais et al (104)   | 2017 | 88                       | 25            | 28               | 40            | 60                   | 2       | 0.89        | 0.67        | 0.83(0.75-0.92) |
| Biais et al (104)   | 2017 | 88                       | 26            | 28               | 51            | 60                   | 6       | 0.93        | 0.85        | 0.95(0.90-0.99) |
| Ali et al (118)     | 2019 | 33                       | 13            | 15               | 18            | 18                   | 5.8     | 0.87        | 1           | 0.96(0.83-0.99) |
| Fot et al (124)     | 2019 | 33                       | 11            | 14               | 12            | 18                   | 2       | 0.8         | 0.67        | 0.75            |
| Fot et al (124)     | 2019 | 33                       | 12            | 14               | 12            | 18                   | 2       | 0.87        | 0.67        | 0.77            |
| Lee et al (127)     | 2020 | 50                       | 26            | 30               | 17            | 20                   | 5       | 0.87        | 0.85        | 0.90(0.82-0.99) |
| Messina et al (139) | 2021 | 103                      | 52            | 53               | 43            | 50                   | 4       | 0.98        | 0.86        | 0.95(0.88-0.98) |

**Table S6. Operative performance of mini-fluid challenge of fluid responsiveness from included studies.** Values are expressed as pooled values (95% confidence interval) or median (IQR). AUC, area under curve reported by each study; NR, not reported.

| Study                | Year | Number total of patients | True positive | Fluid responders | True negative | Non-fluid responders | Cut-off | Sensitivity | Specificity | AUC              |
|----------------------|------|--------------------------|---------------|------------------|---------------|----------------------|---------|-------------|-------------|------------------|
| Myatra et al (99)    | 2017 | 30                       | 15            | 16               | 14            | 14                   | 3.5     | 0.94        | 1           | 0.99(0.98-1.00)  |
| Myatra et al (99)    | 2017 | 30                       | 14            | 16               | 14            | 14                   | 2.5     | 0.88        | 1           | 0.97(0.92-1.00)  |
| Myatra et al (99)    | 2017 | 30                       | 15            | 16               | 14            | 14                   | 48      | 0.94        | 1           | 0.97(0.92-1.00)  |
| Myatra et al (99)    | 2017 | 30                       | 14            | 16               | 13            | 14                   | 43      | 0.88        | 0.93        | 0.96(0.89-1.00)  |
| Yonis et al (100)    | 2017 | 33                       | 15            | 15               | 8             | 18                   | 29      | 1           | 0.4         | 0.59(0.31-0.88)  |
| Messina et al (123)  | 2019 | 40                       | 18            | 19               | 16            | 21                   | 13.3    | 0.94        | 0.76        | 0.94(0.82-0.99)  |
| Messina et al (123)  | 2019 | 40                       | 15            | 19               | 20            | 21                   | 12.1    | 0.78        | 0.95        | 0.93(0.80-0.98)  |
| Jun et al (126)      | 2019 | 38                       | 22            | 24               | 12            | 14                   | 1       | 0.92        | 0.86        | 0.95(0.83-0.99)  |
| Jun et al (126)      | 2019 | 38                       | 11            | 24               | 14            | 14                   | 1       | 0.46        | 1           | 0.76(0.60-0.89)  |
| Jun et al (126)      | 2019 | 38                       | 20            | 24               | 11            | 14                   | 1       | 0.83        | 0.79        | 0.87(0.72-0.96)  |
| Jun et al (126)      | 2019 | 38                       | 16            | 24               | 11            | 14                   | 1       | 0.67        | 0.79        | 0.71(0.55-0.85)  |
| Messina et al (133)  | 2020 | 40                       | 18            | 19               | 20            | 21                   | 3.50%   | 0.95        | 0.94        | 0.96(0.87-1.03)  |
| Messina et al (133)  | 2020 | 40                       | 18            | 19               | 20            | 21                   | 12.2    | 0.95        | 0.94        | 0.96(0.89-1.02)  |
| Hamzaoui et al (134) | 2021 | 54                       | 15            | 22               | 24            | 32                   | 8       | 0.69        | 0.76        | 0.73 (0.60-0.84) |
| Taccheri et al (142) | 2021 | 30                       | 14            | 15               | 13            | 15                   | 2       | 1           | 0.93        | 0.94±0.04        |
| Taccheri et al (142) | 2021 | 30                       | 14            | 15               | 15            | 15                   | 20%     | 0.93        | 0.93        | 0.98±0.03        |
| Taccheri et al (142) | 2021 | 30                       | 15            | 15               | 10            | 15                   | 1       | 1           | 0.67        | 0.82±0.08        |
| Taccheri et al (142) | 2021 | 30                       | 14            | 15               | 11            | 15                   | 20%     | 0.93        | 0.73        | 0.94±0.04        |
| Taccheri et al (142) | 2021 | 30                       | 15            | 15               | 10            | 15                   | 1       | 1           | 0.67        | 0.88±0.06        |
| Taccheri et al (142) | 2021 | 30                       | 15            | 15               | 9             | 15                   | 4%      | 1           | 0.6         | 0.92±0.05        |

| Study               | Year | Number total of patients | True positive | Fluid responders | True negative | Non-fluid responders | Cut-off | Sensitivity | Specificity | AUC             |
|---------------------|------|--------------------------|---------------|------------------|---------------|----------------------|---------|-------------|-------------|-----------------|
| Elsayed et al (143) | 2021 | 46                       | 15            | 16               | 28            | 30                   | 1       | 0.93        | 0.93        | 0.95(0.89-1.00) |
| Shi et al (144)     | 2022 | 84                       | 41            | 42               | 36            | 42                   | 3.5     | 0.98        | 0.86        | 0.94±0.03       |
| Xu et al (147)      | 2022 | 76                       | 26            | 31               | 38            | 45                   | 2       | 0.8         | 0.8         | 0.90(0.80-0.95) |
| Botros et al (149)  | 2023 | 48                       | 19            | 20               | 19            | 28                   | 2.5     | 0.95        | 0.68        | 0.86(0.76-0.96) |
| Botros et al (149)  | 2023 | 48                       | 16            | 20               | 21            | 28                   | 29%     | 0.82        | 0.75        | 0.83(0.72-0.94) |

**Table S7. Operative performance of tidal-volume challenge of fluid responsiveness from included studies.** Values are expressed as pooled values (95% confidence interval) or median (IQR). AUC, area under curve reported by each study.

















| Study              | Year | Risk of bias/Patient selection | Risk of bias/Index test | Risk of bias/Reference Standard | Risk of bias/Flow and timing | Applicability/Patient selection | Applicability/Index test | Applicability/Reference Standard |
|--------------------|------|--------------------------------|-------------------------|---------------------------------|------------------------------|---------------------------------|--------------------------|----------------------------------|
| Mallat et al (148) | 2022 | Low                            | Low                     | Low                             | Low                          | Low                             | Low                      | Low                              |
| Botros et al (149) | 2023 | Low                            | Low                     | Low                             | Low                          | Low                             | Low                      | Low                              |

**Table S8.** Risk of bias of the trials as assessed by QUADAS-2 criteria.

| Predictor of fluid responsiveness evaluated | Intercept (SD) | P value by Egger test |
|---------------------------------------------|----------------|-----------------------|
| PPV                                         | 0.11 (0.27)    | <0.01                 |
| SVV                                         | 0.53(0.36)     | <0.01                 |
| PLR                                         | 1.34(0.33)     | <0.01                 |
| EEOT                                        | -1.15(0.42)    | <0.01                 |
| MFC                                         | 0.92(1.10)     | 0.10                  |
| VTC                                         | 1.12(0.22)     | <0.01                 |

**Table S9. Asymmetry assessment by Egger test.** EEOT, end-expiratory occlusion test, PPV, pulse pressure variation; SVV, stroke volume variation; PLR, passive leg raising; EEOT, end-expiratory occlusion test; MFC, mini-fluid challenge; VTC, tidal volume challenge. Values are expressed as pooled data (95% confidence interval).

| Predictor of Fluid Responsiveness | DOR  | 95% Confidence Interval | I <sup>2</sup> |
|-----------------------------------|------|-------------------------|----------------|
| PPV                               | 7.5  | 4.8-24.5                | 66.3           |
| SVV                               | 6.9  | 5.0-9.4                 | 66.5           |
| PLR                               | 11.3 | 8.3-15.3                | 67.4           |
| EEOT                              | 6.7  | 4.0-11.3                | 77.1           |
| VTC                               | 19.4 | 11.6-33.1               | 47.0           |

**Table S10. Asymmetry fitted by the trim-and-fill method for predictors of fluid responsiveness.** EEOT, end-expiratory occlusion test, I<sup>2</sup>, inconsistency; PPV, pulse pressure variation; SVV, stroke volume variation; PLR, passive leg raising; EEOT, end-expiratory occlusion test. Values are expressed as pooled data (95% confidence interval).

| Subgroup                            | Predictor evaluated | Number Of Studies | Unadjusted DOR (95%CI) | Adjusted DOR (95% CI)                  | P value by subgroup analysis | P value (by meta-regression) | I2(%) |
|-------------------------------------|---------------------|-------------------|------------------------|----------------------------------------|------------------------------|------------------------------|-------|
| Tidal volume > 8 ml/kg<br>Yes<br>No | PPV                 | 39<br>64          | 16.6 (12.9 – 21.7)     | 24.0(17.1-33.5)<br>10.2(7.0-14.8)      | <0.01                        | <0.01<br><0.01               | 50.8  |
| Tidal volume                        | PPV                 | 103               | 16.6 (12.9 – 21.7)     | DOR = 1.2 (ml/kg<br>IBW Vt)            | NA                           | <0.01                        | 50.8  |
| Tidal volume > 8 ml/kg<br>Yes<br>No | SVV                 | 51<br>18          | 14.4(10.7-19.4)        | 14.8(10.5-21.0)<br>13.5(7.6-24.0)      | 0.78                         | NA                           | 54.4  |
| Lung compliance                     | PPV                 | 38                | 16.6 (12.9 – 21.7)     | DOR = 1.05(L/cmH20<br>Lung Compliance) | <0.01                        | <0.01                        | 50.9  |
| Thermodilution<br>Yes<br>No         | PPV                 | 54<br>49          | 16.6 (12.9 – 21.7)     | 14.8(10-3-21.2)<br>19.1(13.1-27.8)     | 0.39                         | NA                           | 54.2  |
| Thermodilution<br>Yes<br>No         | SVV                 | 22<br>47          | 14.4(10.7-19.4)        | 11.2(6.7-19.1)<br>16.2(11.3-23.1)      | 0.27                         | NA                           | 53.7  |
| Thermodilution<br>Yes<br>No         | PLR                 | 22<br>59          | 22.6(17.0-30.2)        | 14.2(8.1-24.7)<br>24.2(17.3-33.9)      | 0.1                          | NA                           | 47.5  |
| Thermodilution<br>Yes<br>No         | EEOT                | 16<br>20          | 17.8(10.7-30.0)        | 67.8(30.0-153.4)<br>9.4(5.6-15.7)      | <0.01                        | <0.01<br><0.01               | 51.3  |
| Thermodilution<br>Yes<br>No         | MFC                 | 5<br>11           | 37.3(21.8-64.0)        | 16.4(7.7-34.8)<br>57.0(31.5-102.7)     | 0.01                         | 0.01<br><0.01                | 9.0   |
| Thermodilution<br>Yes<br>No         | VTC                 | 6<br>19           | 46.6(26.7-81.3)        | 71.0(21.0-239.9)<br>41.9(22.2-78.9)    | 0.45                         | NA                           | 28.5  |
| Threshold >10%<br>Yes<br>No         | PPV                 | 82<br>21          | 16.6 (12.9 – 21.7)     | 19.8(14.7-26.6)<br>9.6(5.8-16.9)       | <0.01                        | <0.01<br><0.01               | 51.7  |

|                                                          |      |    |                 |                       |      |    |      |
|----------------------------------------------------------|------|----|-----------------|-----------------------|------|----|------|
| Threshold >10%                                           | SVV  |    |                 |                       |      |    |      |
| Yes                                                      |      | 43 | 14.4(10.7-19.4) | 15.7(10.6-23.2)       | 0.52 | NA | 54.4 |
| No                                                       |      | 26 |                 | 13.0(8.1-20.4)        |      |    |      |
| Threshold >10%                                           | PLR  |    |                 |                       |      |    |      |
| Yes                                                      |      | 68 | 22.6(17.0-30.2) | 21.6(15.8-29.7)       | 0.47 | NA | 53.6 |
| No                                                       |      | 15 |                 | 29.3(13.9-61.9)       |      |    |      |
| Threshold >10%                                           | EEOT |    |                 |                       |      |    |      |
| Yes                                                      |      | 23 | 17.8(10.7-30.0) | 25.7(13.0-50.5)       | 0.17 | NA | 64.6 |
| No                                                       |      | 13 |                 | 12.3(5.5-28.0)        |      |    |      |
| Threshold >10%                                           | MFC  |    |                 |                       |      |    |      |
| Yes                                                      |      | 13 | 37.3(21.8-64.0) | 34.0(18.0-63.6)       | 0.48 | NA | 34.3 |
| No                                                       |      | 3  |                 | 55.0(16.5-183.0)      |      |    |      |
| Driving pressure                                         | EEOT | 23 | 17.8(10.7-30.0) | DOR =1.1 (cmH20)      | 0.26 | NA | 67.9 |
| Tidal volume                                             | EEOT | 38 | 17.8(10.7-30.0) | DOR = 12.27(Vt ml/kg) | 0.39 | NA | 72.8 |
| Prone position                                           | VTC  |    |                 |                       |      |    |      |
| Yes                                                      |      | 4  | 46.6(26.7-81.3) | 70.0(17.2-283.43)     | 0.54 | NA | 35.4 |
| No                                                       |      | 21 |                 | 43.5(23.5-80.7)       |      |    |      |
| The MFC was included in Fluid responsiveness assessment. | MFC  |    |                 |                       |      |    |      |
| Yes                                                      |      | 13 | 37.3(21.8-64.0) | 45.1(24.4-83.1)       | 0.19 | NA | 28.4 |
| No                                                       |      | 3  |                 | 18.9(5.8-61.0)        |      |    |      |

**Table S11. Adjusted operative performance of the technical variables for predictors of fluid responsiveness evaluated.** DOR: diagnostic odd ratio; I<sup>2</sup>: inconsistency. NA: not applicable; PPV, pulse pressure variation, PLR passive leg raising, EEOT, end-expiratory occlusion test; MFC, mini-fluid challenge; VTC, tidal-volume challenge; ABF, aortic blood flow; CO, cardiac output; CI, cardiac index; SVI, stroke volume index; SV, stroke volume; VTI, velocity-time integral. Values are expressed as pooled data (95% confidence interval).



**Question:** Should Pulse Pressure Variation be used to diagnose an increase in cardiac output in critical care patients after a fluid challenge?

|             |                             |
|-------------|-----------------------------|
| Sensitivity | 0.77 (95% CI: 0.74 to 0.80) |
| Specificity | 0.79 (95% CI: 0.76 to 0.82) |

|            |     |     |     |
|------------|-----|-----|-----|
| Prevalence | 40% | 50% | 60% |
|------------|-----|-----|-----|

| Outcome                                                                                                 | No of studies<br>(No of patients) | Study design                       | Factors that may decrease certainty of evidence |              |               |                      |                  | Effect per 1,000 patients tested |                             |                             | Test accuracy<br>CoE |                  |
|---------------------------------------------------------------------------------------------------------|-----------------------------------|------------------------------------|-------------------------------------------------|--------------|---------------|----------------------|------------------|----------------------------------|-----------------------------|-----------------------------|----------------------|------------------|
|                                                                                                         |                                   |                                    | Risk of bias                                    | Indirectness | Inconsistency | Imprecision          | Publication bias | pre-test probability of 40%      | pre-test probability of 50% | pre-test probability of 60% |                      |                  |
| <b>True positives</b><br>(patients with an increase in cardiac output)                                  | 104 studies<br>2343 patients      | cohort & case-control type studies | not serious                                     | Not serious  | not serious   | serious <sup>b</sup> | none             | 308 (296 to 320)                 | 385 (370 to 400)            | 462 (444 to 480)            | ⊕⊕⊕○<br>Moderate     |                  |
| <b>False negatives</b><br>(patients incorrectly classified as not having an increase in cardiac output) |                                   |                                    |                                                 |              |               |                      |                  | 92 (80 to 104)                   | 115 (100 to 130)            | 138 (120 to 156)            |                      |                  |
| <b>True negatives</b><br>(patients without an increase in cardiac output)                               | 103 studies<br>2011 patients      | cohort & case-control type studies | not serious                                     | Not serious  | not serious   | serious <sup>d</sup> | none             | 474 (456 to 492)                 | 395 (380 to 410)            | 316 (304 to 328)            |                      | ⊕⊕⊕○<br>Moderate |
| <b>False positives</b><br>(patients incorrectly classified as having an increase in cardiac output)     |                                   |                                    |                                                 |              |               |                      |                  | 126 (108 to 144)                 | 105 (90 to 120)             | 84 (72 to 96)               |                      |                  |

Table S12. GRADE assessment for pulse pressure variation.

**Question:** Should Stroke volume variations be used to diagnose an increase in cardiac output in critical care patients after a fluid challenge?

| Sensitivity                                                                                             | 0.77 (95% CI: 0.73 to 0.80)       |                                                 |                                                 | Prevalence   |               |             | 40%              | 50%                              | 60%                         |                             |                      |
|---------------------------------------------------------------------------------------------------------|-----------------------------------|-------------------------------------------------|-------------------------------------------------|--------------|---------------|-------------|------------------|----------------------------------|-----------------------------|-----------------------------|----------------------|
| Specificity                                                                                             | 0.78 (95% CI: 0.74 to 0.82)       |                                                 |                                                 |              |               |             |                  |                                  |                             |                             |                      |
| Outcome                                                                                                 | No of studies<br>(No of patients) | Study design                                    | Factors that may decrease certainty of evidence |              |               |             |                  | Effect per 1,000 patients tested |                             |                             | Test accuracy<br>CoE |
|                                                                                                         |                                   |                                                 | Risk of bias                                    | Indirectness | Inconsistency | Imprecision | Publication bias | pre-test probability of 40%      | pre-test probability of 50% | pre-test probability of 60% |                      |
| <b>True positives</b><br>(patients with an increase in cardiac output)                                  | 69 studies<br>1855 patients       | cross-sectional<br>(cohort type accuracy study) | not serious                                     | not serious  | not serious   | not serious | none             | 308 (292 to 320)                 | 385 (365 to 400)            | 462 (438 to 480)            | ⊕⊕⊕⊕<br>High         |
| <b>False negatives</b><br>(patients incorrectly classified as not having an increase in cardiac output) |                                   |                                                 |                                                 |              |               |             |                  | 92 (80 to 108)                   | 115 (100 to 135)            | 138 (120 to 162)            |                      |
| <b>True negatives</b><br>(patients without an increase in cardiac output)                               | 69 studies<br>1627 patients       | cross-sectional<br>(cohort type accuracy study) | not serious                                     | not serious  | not serious   | not serious | none             | 468 (444 to 492)                 | 390 (370 to 410)            | 312 (296 to 328)            | ⊕⊕⊕⊕<br>High         |
| <b>False positives</b><br>(patients incorrectly classified as having an increase in cardiac output)     |                                   |                                                 |                                                 |              |               |             |                  | 132 (108 to 156)                 | 110 (90 to 130)             | 88 (72 to 104)              |                      |

Table S13. GRADE assessment for stroke volume variation.

**Question:** Should Passive leg raising be used to diagnose an increase in cardiac output in critical care patients after a fluid challenge?

|             |                             |
|-------------|-----------------------------|
| Sensitivity | 0.77 (95% CI: 0.73 to 0.80) |
| Specificity | 0.80 (95% CI: 0.75 to 0.83) |

|            |     |     |     |
|------------|-----|-----|-----|
| Prevalence | 40% | 50% | 60% |
|------------|-----|-----|-----|

| Outcome                                                                                                 | No of studies<br>(No of patients) | Study design                       | Factors that may decrease certainty of evidence |              |               |             |                  | Effect per 1,000 patients tested |                             |                             | Test accuracy<br>CoE |
|---------------------------------------------------------------------------------------------------------|-----------------------------------|------------------------------------|-------------------------------------------------|--------------|---------------|-------------|------------------|----------------------------------|-----------------------------|-----------------------------|----------------------|
|                                                                                                         |                                   |                                    | Risk of bias                                    | Indirectness | Inconsistency | Imprecision | Publication bias | pre-test probability of 40%      | pre-test probability of 50% | pre-test probability of 60% |                      |
| <b>True positives</b><br>(patients with an increase in cardiac output)                                  | 86 studies<br>2115 patients       | cohort & case-control type studies | not serious                                     | not serious  | not serious   | not serious | none             | 308 (292 to 320)                 | 385 (365 to 400)            | 462 (438 to 480)            | ⊕⊕⊕⊕<br>High         |
| <b>False negatives</b><br>(patients incorrectly classified as not having an increase in cardiac output) |                                   |                                    |                                                 |              |               |             |                  | 92 (80 to 108)                   | 115 (100 to 135)            | 138 (120 to 162)            |                      |
| <b>True negatives</b><br>(patients without an increase in cardiac output)                               | 83 studies<br>1998 patients       | cohort & case-control type studies | not serious                                     | not serious  | not serious   | not serious | none             | 0 (0 to 0)                       | 0 (0 to 0)                  | 0 (0 to 0)                  | ⊕⊕⊕⊕<br>High         |
| <b>False positives</b><br>(patients incorrectly classified as having an increase in cardiac output)     |                                   |                                    |                                                 |              |               |             |                  | 600 (600 to 600)                 | 500 (500 to 500)            | 400 (400 to 400)            |                      |

Table S14. GRADE assessment for passive leg raising.

**Question:** Should end-expiratory occlusion test be used to diagnose increase in cardiac output in critical care patients after a fluid challenge?

| Sensitivity                                                                                          | 0.76 (95% CI: 0.70 to 0.81)       |                                                 | Prevalence                                      |              |               | 40%         | 50%              | 60%                              |                             |                             |                      |
|------------------------------------------------------------------------------------------------------|-----------------------------------|-------------------------------------------------|-------------------------------------------------|--------------|---------------|-------------|------------------|----------------------------------|-----------------------------|-----------------------------|----------------------|
| Specificity                                                                                          | 0.77 (95% CI: 0.71 to 0.83)       |                                                 |                                                 |              |               |             |                  |                                  |                             |                             |                      |
| Outcome                                                                                              | No of studies<br>(No of patients) | Study design                                    | Factors that may decrease certainty of evidence |              |               |             |                  | Effect per 1,000 patients tested |                             |                             | Test accuracy<br>CoE |
|                                                                                                      |                                   |                                                 | Risk of bias                                    | Indirectness | Inconsistency | Imprecision | Publication bias | pre-test probability of 40%      | pre-test probability of 50% | pre-test probability of 60% |                      |
| <b>True positives</b><br>(patients with increase in cardiac output)                                  | 36 studies<br>802 patients        | cross-sectional<br>(cohort type accuracy study) | not serious                                     | not serious  | not serious   | not serious | none             | 304 (280 to 324)                 | 380 (350 to 405)            | 456 (420 to 486)            | ⊕⊕⊕⊕<br>High         |
| <b>False negatives</b><br>(patients incorrectly classified as not having increase in cardiac output) |                                   |                                                 |                                                 |              |               |             |                  | 96 (76 to 120)                   | 120 (95 to 150)             | 144 (114 to 180)            |                      |
| <b>True negatives</b><br>(patients without increase in cardiac output)                               | 36 studies<br>836 patients        | cross-sectional<br>(cohort type accuracy study) | not serious                                     | not serious  | not serious   | not serious | none             | 462 (426 to 498)                 | 385 (355 to 415)            | 308 (284 to 332)            | ⊕⊕⊕⊕<br>High         |
| <b>False positives</b><br>(patients incorrectly classified as having increase in cardiac output)     |                                   |                                                 |                                                 |              |               |             |                  | 138 (102 to 174)                 | 115 (85 to 145)             | 92 (68 to 116)              |                      |

Table S15. GRADE assessment for End-expiratory occlusion test.

**Question:** Should mini-fluid challenge be used to diagnose an increase in cardiac output in critical care patients after fluid challenge?

| Sensitivity                                                                                             | 0.85 (95% CI: 0.79 to 0.90)       |                                                 | Prevalence                                      |              |               | 40%         | 50%              | 60%                              |                             |                             |                      |
|---------------------------------------------------------------------------------------------------------|-----------------------------------|-------------------------------------------------|-------------------------------------------------|--------------|---------------|-------------|------------------|----------------------------------|-----------------------------|-----------------------------|----------------------|
| Specificity                                                                                             | 0.84 (95% CI: 0.78 to 0.88)       |                                                 |                                                 |              |               |             |                  |                                  |                             |                             |                      |
| Outcome                                                                                                 | No of studies<br>(No of patients) | Study design                                    | Factors that may decrease certainty of evidence |              |               |             |                  | Effect per 1,000 patients tested |                             |                             | Test accuracy<br>CoE |
|                                                                                                         |                                   |                                                 | Risk of bias                                    | Indirectness | Inconsistency | Imprecision | Publication bias | pre-test probability of 40%      | pre-test probability of 50% | pre-test probability of 60% |                      |
| <b>True positives</b><br>(patients with an increase in cardiac output)                                  | 16 studies<br>418 patients        | cross-sectional<br>(cohort type accuracy study) | not serious                                     | not serious  | not serious   | not serious | none             | 340 (316 to 360)                 | 425 (395 to 450)            | 510 (474 to 540)            | ⊕⊕⊕⊕<br>High         |
| <b>False negatives</b><br>(patients incorrectly classified as not having an increase in cardiac output) |                                   |                                                 |                                                 |              |               |             |                  | 60 (40 to 84)                    | 75 (50 to 105)              | 90 (60 to 126)              |                      |
| <b>True negatives</b><br>(patients without an increase in cardiac output)                               | 16 studies<br>457 patients        | cross-sectional<br>(cohort type accuracy study) | not serious                                     | not serious  | not serious   | not serious | none             | 504 (468 to 528)                 | 420 (390 to 440)            | 336 (312 to 352)            | ⊕⊕⊕⊕<br>High         |
| <b>False positives</b><br>(patients incorrectly classified as having an increase in cardiac output)     |                                   |                                                 |                                                 |              |               |             |                  | 96 (72 to 132)                   | 80 (60 to 110)              | 64 (48 to 88)               |                      |

Table S16. GRADE assessment for mini-fluid challenge.

**Question:** Should tidal volume challenge be used to diagnose an increase in cardiac output in critical care patients after a fluid challenge?

|             |                             |
|-------------|-----------------------------|
| Sensitivity | 0.86 (95% CI: 0.81 to 0.91) |
| Specificity | 0.80 (95% CI: 0.74 to 0.85) |

|            |     |     |     |
|------------|-----|-----|-----|
| Prevalence | 40% | 50% | 60% |
|------------|-----|-----|-----|

| Outcome                                                                                                 | No of studies<br>(No of patients) | Study design                       | Factors that may decrease certainty of evidence |              |               |             |                  | Effect per 1,000 patients tested |                             |                             | Test accuracy<br>CoE |
|---------------------------------------------------------------------------------------------------------|-----------------------------------|------------------------------------|-------------------------------------------------|--------------|---------------|-------------|------------------|----------------------------------|-----------------------------|-----------------------------|----------------------|
|                                                                                                         |                                   |                                    | Risk of bias                                    | Indirectness | Inconsistency | Imprecision | Publication bias | pre-test probability of 40%      | pre-test probability of 50% | pre-test probability of 60% |                      |
| <b>True positives</b><br>(patients with an increase in cardiac output)                                  | 25 studies<br>518 patients        | cohort & case-control type studies | not serious                                     | not serious  | not serious   | not serious | none             | 344 (324 to 364)                 | 430 (405 to 455)            | 516 (486 to 546)            | ⊕⊕⊕⊕<br>High         |
| <b>False negatives</b><br>(patients incorrectly classified as not having an increase in cardiac output) |                                   |                                    |                                                 |              |               |             |                  | 56 (36 to 76)                    | 70 (45 to 95)               | 84 (54 to 114)              |                      |
| <b>True negatives</b><br>(patients without an increase in cardiac output)                               | 25 studies<br>483 patients        | cohort & case-control type studies | not serious                                     | not serious  | not serious   | not serious | none             | 480 (444 to 510)                 | 400 (370 to 425)            | 320 (296 to 340)            | ⊕⊕⊕⊕<br>High         |
| <b>False positives</b><br>(patients incorrectly classified as having an increase in cardiac output)     |                                   |                                    |                                                 |              |               |             |                  | 120 (90 to 156)                  | 100 (75 to 130)             | 80 (60 to 104)              |                      |

Table S17. GRADE assessment for tidal-volume challenge.

| Risk of bias within studies (QUADAS-2) | Predictor | Number of studies | Adjusted diagnostic odds ratios (95% CI) | P value by subgroup analysis | I <sup>2</sup> (%) |
|----------------------------------------|-----------|-------------------|------------------------------------------|------------------------------|--------------------|
| Low                                    | PPV       | 87                | 16.6 (12.5 – 22.0)                       | 0.11                         | 51.5               |
| High                                   |           | 3                 | 5.6 (1.6 – 19.1)                         |                              |                    |
| Unclear                                |           | 13                | 26.8 (12.1 – 59.4)                       |                              |                    |
| Low                                    | SVV       | 60                | 13.8 (10.1 – 18.8)                       | 0.29                         | 51.4               |
| High                                   |           | 1                 | 6.0(0.87-41.0)                           |                              |                    |
| Unclear                                |           | 8                 | 26.5 (10.2 – 68.4)                       |                              |                    |
| Low                                    | PLR       | 79                | 22.9(17.0-30.9)                          | 0.76                         | 55.4               |
| Unclear                                |           | 4                 | 18.6(5-0-69.1)                           |                              |                    |
| Low                                    | EOOT      | 34                | 18.7 (10.4-31.7)                         | 0.94                         | 66.6               |
| High                                   |           | 4                 | 17.7(3.49-84.5)                          |                              |                    |
| Low                                    | MFC       | 14                | 38.9 (21.1 – 71.9)                       | 0.8                          | 34.3               |
| High                                   |           | 2                 | 32.3 (8.0 – 129.9)                       |                              |                    |

**Table S18. Sensitivity analysis of predictor of fluid responsiveness based on the methodological quality of the included studies.** EEOT, end-expiratory occlusion test; I<sup>2</sup>= inconsistency; PLR, passive leg raising; PPV, pulse pressure variation; MFC, mini-fluid challenge. QUADAS-2, quality assessment of diagnostic accuracy studies; SVV, stroke volume variation. Values are expressed as pooled data (95% confidence interval)

| Risk of bias within studies                        | Predictor | Number of studies | Adjusted diagnostic odds ratios<br>(95% CI) | P value by test for<br>subgroup | I <sup>2</sup> (%) | R <sup>2</sup> (%) |
|----------------------------------------------------|-----------|-------------------|---------------------------------------------|---------------------------------|--------------------|--------------------|
| Measurement method to assess excitation<br>method: | PPV       |                   |                                             |                                 |                    |                    |
| PAC                                                |           | 13                | 35.9(15.9-80.8)                             | 0.06                            | 50.60              | 10.37              |
| PAC y TPTD(PiCCO)                                  |           | 2                 | 17.7(3.3-94.6)                              |                                 |                    |                    |
| Esophageal Doppler                                 |           | 12                | 19.7(9.4-41.3)                              |                                 |                    |                    |
| TTE                                                |           | 1                 | 40.0(1.8-890.4)                             |                                 |                    |                    |
| TEE                                                |           | 10                | 38.5(16.6-89.3)                             |                                 |                    |                    |
| PCA(LiCCO)                                         |           | 1                 | 15.11(1.24-184.75)                          |                                 |                    |                    |
| TPTD(LiCCO)                                        |           | 1                 | 2173.0(28.8-164079.32)                      |                                 |                    |                    |
| NC-PCA(Mostcare)                                   |           | 4                 | 18.2(5.4-61.5)                              |                                 |                    |                    |
| C-PCA(PiCCO)                                       |           | 3                 | 9.1(2.5-33.7)                               |                                 |                    |                    |
| TPTD(PiCCO)                                        |           | 32                | 10.3(6.6-15.9)                              |                                 |                    |                    |
| NC-PCA(Pulsioflex/ProAQT)                          |           | 2                 | 4.3(0.9-19.0)                               |                                 |                    |                    |
| NC-PCA(Vigileo)                                    |           | 14                | 18.5(9.2-37.0)                              |                                 |                    |                    |
| CAP (Vigilance)                                    |           | 6                 | 16.3(5.6-47.4)                              |                                 |                    |                    |
| NC-PCA(ModelgFlow)                                 |           | 2                 | 17.4(2.0-152.4)                             |                                 |                    |                    |
| Clinical setting                                   | PPV       |                   |                                             |                                 |                    |                    |
| Septic                                             |           | 39                | 19.32(12.4-30.1)                            | 0.98                            | 52.8               | 0.0                |
| Surgical                                           |           | 22                | 13.61(8.1-23.0)                             |                                 |                    |                    |
| Cardiovascular                                     |           | 26                | 16.16(9.5-27.6)                             |                                 |                    |                    |
| Neurosurgical                                      |           | 5                 | 16.31(8.3-32.1)                             |                                 |                    |                    |
| Mix                                                |           | 1                 | 12.5-22484.1)                               |                                 |                    |                    |
| Number of patients included in each study          | PPV       | 103               | 2.87(2.1-3.9)                               | 0.15                            | 53.5               | 9.4                |
| Clinical setting                                   | SVV       |                   |                                             |                                 |                    |                    |
| Septic                                             |           | 15                | 17.7(10.9-28.8)                             | 0.77                            | 54.2               | 0.0                |
| Surgical                                           |           | 21                | 8.12(4.9-13.3)                              |                                 |                    |                    |



|                                           |      |    |                               |      |      |      |
|-------------------------------------------|------|----|-------------------------------|------|------|------|
| Cardiovascular                            |      | 21 | 21.0(12.4-35.7)               |      |      |      |
| Neurosurgical                             |      | 10 | 13.7(6.9-27.4)                |      |      |      |
| Mix                                       |      | 2  | 19.71(3.5-109.4)              |      |      |      |
| Number of patients included in each study | SVV  | 69 | 2.75 +1.01(1.00-1.02)         | 0.18 | 58.2 | 3.16 |
| Clinical Setting                          | PLR  |    |                               |      |      |      |
| Cardiovascular                            |      | 7  | 18.8(6.6-53.4)                | 0.35 | 55.6 | 0.0  |
| Surgical                                  |      | 14 | 23.8(11.3-50.0)               |      |      |      |
| Septic                                    |      | 51 | 27.4(18.6-40.5)               |      |      |      |
| Mix                                       |      | 11 | 12.8(6.0-27.2)                |      |      |      |
| Number of patients included in each study | PLR  | 83 | DOR=3.8(2.9-4.8)              | 0.44 | 64.6 | 1.55 |
| Number of patients included in each study | EEOT | 36 | DOR = 6.75 – 0.99 (0.98-1.00) | 0.04 | 62.2 | 14.2 |

**Table S19. Sensitivity analysis of predictor of fluid responsiveness based on the method to measure cardiac output, clinical setting evaluated, hemodynamic variable to determine PLR/EEOT-response, device used to measure PLR response and the number of patients included in each study.**  $I^2$ , inconsistency,  $R^2$ , amounts of heterogeneity; C-TD, continuous thermodilution; C-PCA, calibrated pulse contour analysis; CO, cardiac output; CI, cardiac index; EEOT, end-expiratory occlusion test; NC-PCA, non-calibrated pulse contour analysis; PAC, pulmonary artery catheter; PLR, passive leg raising; PPV, pulse pressure variation; SV, stroke volume; SVI, stroke volume index; SVV, stroke volume variation; TEE, transesophageal echocardiography; TPTD, transpulmonary thermodilution; TTE, transthoracic echocardiography; VTI, velocity time integral.



## References

1. Michard F, Chemla D, Richard C, et al.: Clinical use of respiratory changes in arterial pulse pressure to monitor the hemodynamic effects of PEEP. *Am J Respir Crit Care Med* 1999; 159:935–939
2. Berkenstadt H, Margalit N, Hadani M, et al.: Stroke volume variation as a predictor of fluid responsiveness in patients undergoing brain surgery. *Anesth Analg* 2001; 92:984–989
3. Kramer A, Zygun D, Hawes H, et al.: Pulse pressure variation predicts fluid responsiveness following coronary artery bypass surgery. *Chest* 2004; 126:1563–1568
4. de Backer D, Heenen S, Piagnerelli M, et al.: Pulse pressure variations to predict fluid responsiveness: influence of tidal volume. *Intensive Care Med* 2005; 31:517–23
5. Feissel M, Badie J, Merlani PG, et al.: Pre-ejection period variations predict the fluid responsiveness of septic ventilated patients. *Crit Care Med* 2005; 33:2534–2539
6. Hofer CK, Müller SM, Furrer L, et al.: Stroke volume and pulse pressure variation for prediction of fluid responsiveness in patients undergoing off-pump coronary artery bypass grafting. *Chest* 2005; 128:848–854
7. Lafanechère A, Pène F, Goulenok C, et al.: Changes in aortic blood flow induced by passive leg raising predict fluid responsiveness in critically ill patients. *Crit Care* 2006; 10:1–8
8. Monnet X, Rienzo M, Osman D, et al.: Passive leg raising predicts fluid responsiveness in the critically ill. *Crit Care Med* 2006; 34:1402–1407
9. Charron C, Fessenmeyer C, Cosson C, et al.: The influence of tidal volume on the dynamic variables of fluid responsiveness in critically ill patients. *Anesth Analg* 2006; 102:1511–1517
10. Cannesson M, Attof Y, Rosamel P, et al.: Respiratory variations in pulse oximetry plethysmographic waveform amplitude to predict fluid responsiveness in the operating room. *Anesthesiology* 2007; 106:1105–1111
11. Feissel M, Teboul JL, Merlani P, et al.: Plethysmographic dynamic indices predict fluid responsiveness in septic ventilated patients. *Intensive Care Med* 2007; 33:993–999
12. Wyffels P a. H, Durnez P-J, Helderweirt J, et al.: Ventilation-Induced Plethysmographic Variations Predict Fluid Responsiveness in Ventilated Postoperative Cardiac Surgery Patients. *Anesth Analg* 2007; 105:448–452
13. Maizel J, Airapetian N, Lorne E, et al.: Diagnosis of central hypovolemia by using passive leg raising. *Intensive Care Med* 2007; 33:1133–1138
14. Lamia B, Ochagavia A, Monnet X, et al.: Echocardiographic prediction of volume responsiveness in critically ill patients with spontaneously breathing activity. *Intensive Care Med* 2007; 33:1125–1132
15. Auler JOJ, Galas F, Hajjar L, et al.: Online monitoring of pulse pressure variation to guide fluid therapy after cardiac surgery. *Anesth Analg* 2008; 106:1201–1206
16. Cannesson M, Desebbe O, Rosamel P, et al.: Pleth variability index to monitor the respiratory variations in the pulse oximeter plethysmographic waveform

- amplitude and predict fluid responsiveness in the operating theatre. *Br J Anaesth* 2008; 101:200–206
17. Huang C-C, Fu J-Y, Hu H-C, et al.: Prediction of fluid responsiveness in acute respiratory distress syndrome patients ventilated with low tidal volume and high positive end-expiratory pressure. *Crit Care Med* 2008; 36:2810–2816
  18. Derichard A, Robin E, Tavernier B, et al.: Automated pulse pressure and stroke volume variations from radial artery: evaluation during major abdominal surgery. *Br J Anaesth* 2009; 103:678–684
  19. de Waal EEC, Rex S, Kruitwagen CLJJ, et al.: Dynamic preload indicators fail to predict fluid responsiveness in open-chest conditions\*. *Crit Care Med* 2009; 37:510–515
  20. Cannesson M, Musard H, Desebbe O, et al.: The ability of stroke volume variations obtained with vigileo/flotrac system to monitor fluid responsiveness in mechanically ventilated patients. *Anesth Analg* 2009; 108:513–517
  21. Monge García MI, Gil Cano A, Díaz Monrové JC: Brachial artery peak velocity variation to predict fluid responsiveness in mechanically ventilated patients. *Crit Care* 2009; 13:1–9
  22. Vistisen ST, Struijk JJ, Larsson A: Automated pre-ejection period variation indexed to tidal volume predicts fluid responsiveness after cardiac surgery. *Acta Anaesthesiol Scand* 2009; 53:534–542
  23. Vallée F, Richard JCM, Mari A, et al.: Pulse pressure variations adjusted by alveolar driving pressure to assess fluid responsiveness. *Intensive Care Med* 2009; 35:1004–1010
  24. Lahner D, Kabon B, Marschalek C, et al.: Evaluation of stroke volume variation obtained by arterial pulse contour analysis to predict fluid responsiveness intraoperatively. *Br J Anaesth* 2009; 103:346–351
  25. Biais M, Vidil L, Sarrabay P, et al.: Changes in stroke volume induced by passive leg raising in spontaneously breathing patients: comparison between echocardiography and Vigileo/FloTrac device. *Crit Care* 2009; 13:R195
  26. Thiel SW, Kollef MH, Isakow W: Non-invasive stroke volume measurement and passive leg raising predict volume responsiveness in medical ICU patients: an observational cohort study. *Crit Care* 2009; 13:R111
  27. Monnet X, Osman D, Ridel C, et al.: Predicting volume responsiveness by using the end-expiratory occlusion in mechanically ventilated intensive care unit patients. *Crit Care Med* 2009; 37:951–6
  28. Muller L, Louart G, Bousquet P-JJ, et al.: The influence of the airway driving pressure on pulsed pressure variation as a predictor of fluid responsiveness. *Intensive Care Med* 2010; 36:496–503
  29. Biais M, Bernard O, Ha JC, et al.: Abilities of pulse pressure variations and stroke volume variations to predict fluid responsiveness in prone position during scoliosis surgery. *Br J Anaesth* 2010; 104:407–413
  30. Zimmermann M, Feibicke T, Keyl C, et al.: Accuracy of stroke volume variation compared with pleth variability index to predict fluid responsiveness in mechanically ventilated patients undergoing major surgery. *Eur J Anaesthesiol* 2010; 27:555–561

31. Préau S, Saulnier F, Dewavrin F, et al.: Passive leg raising is predictive of fluid responsiveness in spontaneously breathing patients with severe sepsis or acute pancreatitis. *Crit Care Med* 2010; 38:819–825
32. Lakhal K, Ehrmann S, Benzekri-Lefèvre D, et al.: Respiratory pulse pressure variation fails to predict fluid responsiveness in acute respiratory distress syndrome. *Crit Care* 2011; 15:R85
33. Geerts BF, Maas J, de Wilde RBPP, et al.: Arm occlusion pressure is a useful predictor of an increase in cardiac output after fluid loading following cardiac surgery. *Eur J Anaesthesiol* 2011; 28:802–806
34. Desgranges F-P, Desebbe O, Ghazouani A, et al.: Influence of the site of measurement on the ability of plethysmographic variability index to predict fluid responsiveness. *Br J Anaesth* 2011; 107:329–335
35. Machare-Delgado E, Decaro M, Marik PE: Inferior vena cava variation compared to pulse contour analysis as predictors of fluid responsiveness: a prospective cohort study. *J Intensive Care Med* 2011; 26:116–124
36. Huang L, Zhang WX, Cai WX, et al.: Passive leg raising predicts volume responsiveness in patients with severe sepsis and septic shock. *Chinese Critical Care Medicine* 2011; 23:154–157
37. Broch O, Bein B, Gruenewald M, et al.: Accuracy of the pleth variability index to predict fluid responsiveness depends on the perfusion index. *Acta Anaesthesiol Scand* 2011; 55:686–693
38. Geerts B, de Wilde R, Aarts L, et al.: Pulse contour analysis to assess hemodynamic response to passive leg raising. *J Cardiothorac Vasc Anesth* 2011; 25:48–52
39. Loupec T, Nanadoumgar H, Frasca D, et al.: Pleth variability index predicts fluid responsiveness in critically ill patients. *Crit Care Med* 2011; 39:294–299
40. Muller L, Toumi M, Bousquet P-J, et al.: An Increase in Aortic Blood Flow after an Infusion of 100 ml Colloid over 1 Minute Can Predict Fluid Responsiveness The Mini-fluid Challenge Study. *Anesthesiology* 2011; 115:541–7
41. Fellahi J-L, Fischer M-O, Dalbera A, et al.: Can endotracheal bioimpedance cardiography assess hemodynamic response to passive leg raising following cardiac surgery? *Ann Intensive Care* 2012; 2:1–12
42. Fellahi JL, Fischer MO, Rebet O, et al.: A comparison of endotracheal bioimpedance cardiography and transpulmonary thermodilution in cardiac surgery patients. *J Cardiothorac Vasc Anesth* 2012; 26:217–222
43. Khwannimit B, Bhurayanontachai R: Prediction of fluid responsiveness in septic shock patients: comparing stroke volume variation by FloTrac/Vigileo and automated pulse pressure variation. *Eur J Anaesthesiol* 2012; 29:64–69
44. Monnet X, Bleibtreu A, Ferré A, et al.: Passive leg-raising and end-expiratory occlusion tests perform better than pulse pressure variation in patients with low respiratory system compliance. *Crit Care Med* 2012; 40:152–7
45. Monnet X, Dres M, Ferré A, et al.: Prediction of fluid responsiveness by a continuous non-invasive assessment of arterial pressure in critically ill patients: Comparison with four other dynamic indices. *Br J Anaesth* 2012; 109:330–338

46. Cecconi M, Monti G, Hamilton MA, et al.: Efficacy of functional hemodynamic parameters in predicting fluid responsiveness with pulse power analysis in surgical patients. *Minerva Anesthesiol* 2012; 78:527–533
47. Yazigi A, Khoury E, Hlais S, et al.: Pulse pressure variation predicts fluid responsiveness in elderly patients after coronary artery bypass graft surgery. *J Cardiothorac Vasc Anesth* 2012; 26:387–390
48. Oliveira-Costa CDA, Friedman G, Vieira SRR, et al.: Pulse pressure variation and prediction of fluid responsiveness in patients ventilated with low tidal volumes. *Clinics (Sao Paulo)* 2012; 67:773–778
49. Biais M, Cottenceau V, Stecken L, et al.: Evaluation of stroke volume variations obtained with the pressure recording analytic method. *Crit Care Med* 2012; 40:1186–1191
50. Fu Q, Mi WD, Zhang H: Stroke volume variation and pleth variability index to predict fluid responsiveness during resection of primary retroperitoneal tumors in Hans Chinese. *Biosci Trends* 2012; 6:38–43
51. Li J, Ji FH, Yang JP: Evaluation of stroke volume variation obtained by the flotrac™/Vigileo™ system to guide preoperative fluid therapy in patients undergoing brain surgery. *J Int Med Res* 2012; 40:1175–1181
52. Dong Z-Z, Fang Q, Zheng X, et al.: Passive leg raising as an indicator of fluid responsiveness in patients with severe sepsis. *World J Emerg Med* 2012; 3:191–196
53. Monge García MI, Cano AG, Romero MG, et al.: Non-invasive assessment of fluid responsiveness by changes in partial end-tidal CO<sub>2</sub> pressure during a passive leg-raising maneuver. *Ann Intensive Care* 2012; 2:9
54. Broch O, Renner J, Gruenewald M, et al.: Variation of left ventricular outflow tract velocity and global end-diastolic volume index reliably predict fluid responsiveness in cardiac surgery patients. *J Crit Care* 2012; 27:325.e7-325.e13
55. Monnet X, Guérin L, Jozwiak M, et al.: Pleth variability index is a weak predictor of fluid responsiveness in patients receiving norepinephrine. *Br J Anaesth* 2013; 110:207–213
56. Monnet X, Bataille AA, Magalhaes E, et al.: End-tidal carbon dioxide is better than arterial pressure for predicting volume responsiveness by the passive leg raising test. *Intensive Care Med* 2013; 39:93–100
57. Davies SJ, Minhas S, Wilson RJT, et al.: Comparison of stroke volume and fluid responsiveness measurements in commonly used technologies for goal-directed therapy. *J Clin Anesth* 2013; 25:466–474
58. Nordström J, Hällsjö-Sander C, Shore R, et al.: Stroke volume optimization in elective bowel surgery: A comparison between pulse power wave analysis (LiDCOrapid) and oesophageal Doppler (CardioQ). *Br J Anaesth* 2013; 110:374–380
59. Fischer MO, Coucoravas J, Truong J, et al.: Assessment of changes in cardiac index and fluid responsiveness: A comparison of Nexfin and transpulmonary thermodilution. *Acta Anaesthesiol Scand* 2013; 57:704–712
60. Ishihara H, Hashiba E, Okawa H, et al.: Neither dynamic, static, nor volumetric variables can accurately predict fluid responsiveness early after abdominothoracic esophagectomy. *Perioperative Medicine* 2013; 2:1–8

61. Drvar Z, Tonković D, Pavlek M, et al.: Stroke volume variation and pulse pressure variation as predictors of fluid responsiveness in patients with sepsis. *Neurologia Croatica* 2013; 62:1–4
62. Freitas FGR, Bafi AT, Nascente APM, et al.: Predictive value of pulse pressure variation for fluid responsiveness in septic patients using lung-protective ventilation strategies. *Br J Anaesth* 2013; 110:402–408
63. Trepte CJC, Eichhorn V, Haas SA, et al.: Comparison of an automated respiratory systolic variation test with dynamic preload indicators to predict fluid responsiveness after major surgery. *Br J Anaesth* 2013; 111:736–742
64. Yang S-Y, Shim J-K, Song Y, et al.: Validation of pulse pressure variation and corrected flow time as predictors of fluid responsiveness in patients in the prone position. *Br J Anaesth* 2013; 110:713–720
65. Kim SY, Song Y, Shim JK, et al.: Effect of pulse pressure on the predictability of stroke volume variation for fluid responsiveness in patients with coronary disease. *J Crit Care* 2013; 28:318.e1–7
66. Saugel B, Kirsche S v, Hapfelmeier A, et al.: Prediction of fluid responsiveness in patients admitted to the medical intensive care unit. *J Crit Care* 2013; 28:537.e1–9
67. Kupersztych-Hagege E, Teboul J-L, Artigas A, et al.: Bioreactance is not reliable for estimating cardiac output and the effects of passive leg raising in critically ill patients. *Br J Anaesth* 2013; 111:961–966
68. Silva S, Jozwiak M, Teboul J-L, et al.: End-Expiratory Occlusion Test Predicts Preload Responsiveness Independently of Positive End-Expiratory Pressure During Acute Respiratory Distress Syndrome. *Crit Care Med* 2013; 41:1692–1701
69. Pei S, Yuan W, Mai H, et al.: Efficacy of dynamic indices in predicting fluid responsiveness in patients with obstructive jaundice. *Physiol Meas* 2014; 35:369–382
70. Høiseth LØ, Hoff IE, Hagen OA, et al.: Dynamic variables and fluid responsiveness in patients for aortic stenosis surgery. *Acta Anaesthesiol Scand* 2014; 58:826–834
71. Guarracino F, Ferro B, Forfori F, et al.: Jugular vein distensibility predicts fluid responsiveness in septic patients. *Crit Care* 2014; 18:1–8
72. Song Y, Kwak YL, Song JW, et al.: Respirophasic carotid artery peak velocity variation as a predictor of fluid responsiveness in mechanically ventilated patients with coronary artery disease. *Br J Anaesth* 2014; 113:61–66
73. Shim J-K, Song J-W, Song Y, et al.: Pulse pressure variation is not a valid predictor of fluid responsiveness in patients with elevated left ventricular filling pressure. *J Crit Care* 2014; 29:987–91
74. Fischer M-O, Pellissier A, Saplaçan V, et al.: Cephalic versus digital plethysmographic variability index measurement: a comparative pilot study in cardiac surgery patients. *J Cardiothorac Vasc Anesth* 2014; 28:1510–1515
75. Kurtz P, Helbok R, Ko S-B, et al.: Fluid responsiveness and brain tissue oxygen augmentation after subarachnoid hemorrhage. *Neurocrit Care* 2014; 20:247–254
76. Guinot P-G, de Broca B, Bernard E, et al.: Respiratory stroke volume variation assessed by oesophageal Doppler monitoring predicts fluid responsiveness during laparoscopy. *Br J Anaesth* 2014; 112:660–664

77. Kang W-S, Kim S-H, Kim SY, et al.: The influence of positive end-expiratory pressure on stroke volume variation in patients undergoing cardiac surgery: An observational study. *Journal of Thoracic and Cardiovascular Surgery* 2014; 148:3139–3145
78. Guinot P-GG, Godart J, de Broca B, et al.: End-expiratory occlusion manoeuvre does not accurately predict fluid responsiveness in the operating theatre. *Br J Anaesth* 2014; 112:1050–1054
79. Wu Y, Zhou S, Zhou Z, et al.: A 10-second fluid challenge guided by transthoracic echocardiography can predict fluid responsiveness. *Crit Care* 2014; 18:1–8
80. Messina A, Colombo D, Cammarota G, et al.: Patient-ventilator asynchrony affects pulse pressure variation prediction of fluid responsiveness. *J Crit Care* 2015; 30:1067–1071
81. Zhao F, Wang P, Pei S, et al.: Automated stroke volume and pulse pressure variations predict fluid responsiveness in mechanically ventilated patients with obstructive jaundice. *Int J Clin Exp Med* 2015; 8:20751–20759
82. Ibarra-Estrada M, López-Pulgarín JA, Mijangos-Méndez JC, et al.: Respiratory variation in carotid peak systolic velocity predicts volume responsiveness in mechanically ventilated patients with septic shock: a prospective cohort study. *Crit Ultrasound J* 2015; 7:1–9
83. Angappan S, Parida S, Vasudevan A, et al.: The comparison of stroke volume variation with central venous pressure in predicting fluid responsiveness in septic patients with acute circulatory failure. *Indian Journal of Critical Care Medicine* 2015; 19:394–400
84. Airapetian N, Maizel J, Alyamani O, et al.: Does inferior vena cava respiratory variability predict fluid responsiveness in spontaneously breathing patients? *Crit Care* 2015; 19:400
85. Guinot PG, Bernard E, Defrancq F, et al.: Mini-fluid challenge predicts fluid responsiveness during spontaneous breathing under spinal anaesthesia: An observational study. *Eur J Anaesthesiol* 2015; 32:645–649
86. Mallat J, Meddour M, Durville E, et al.: Decrease in pulse pressure and stroke volume variations after mini-fluid challenge accurately predicts fluid responsiveness. *Br J Anaesth* 2015; 115:449–456
87. Theerawit P, Morasert T, Sutherasan Y: Inferior vena cava diameter variation compared with pulse pressure variation as predictors of fluid responsiveness in patients with sepsis. *J Crit Care* 2016; 36:246–251
88. Lee SH, Chun Y-MM, Oh YJ, et al.: Prediction of fluid responsiveness in the beach chair position using dynamic preload indices. *J Clin Monit Comput* 2016; 30:995–1002
89. Cherpanath TGV, Geerts BF, Maas JJ, et al.: Ventilator-induced central venous pressure variation can predict fluid responsiveness in post-operative cardiac surgery patients. *Acta Anaesthesiol Scand* 2016; 60:1395–1403
90. Zhang X, Feng J, Zhu P, et al.: Ultrasonographic measurements of the inferior vena cava variation as a predictor of fluid responsiveness in patients undergoing anesthesia for surgery. *J Surg Res* 2016; 204:118–122



91. Fischer M-O, Rebet O, Guinot P-G, et al.: Assessment of changes in cardiac index with calibrated pulse contour analysis in cardiac surgery: A prospective observational study. *Anaesth Crit Care Pain Med* 2016; 35:261–267
92. Kim N, Shim J-K, Choi HG, et al.: Comparison of positive end-expiratory pressure-induced increase in central venous pressure and passive leg raising to predict fluid responsiveness in patients with atrial fibrillation. *Br J Anaesth* 2016; 116:350–356
93. de Oliveira OH, Freitas FGR de, Ladeira RT, et al.: Comparison between respiratory changes in the inferior vena cava diameter and pulse pressure variation to predict fluid responsiveness in postoperative patients. *J Crit Care* 2016; 34:46–49
94. Sobczyk D, Nycz K, Andruszkiewicz P, et al.: Ultrasonographic caval indices do not significantly contribute to predicting fluid responsiveness immediately after coronary artery bypass grafting when compared to passive leg raising. *Cardiovasc Ultrasound* 2016; 14:1–8
95. Liu Y, Wei L, Li G, et al.: Pulse Pressure Variation Adjusted by Respiratory Changes in Pleural Pressure, Rather Than by Tidal Volume, Reliably Predicts Fluid Responsiveness in Patients With Acute Respiratory Distress Syndrome. *Crit Care Med* 2016; 44:342–51
96. Vistisen ST: Using extra systoles to predict fluid responsiveness in cardiothoracic critical care patients. *J Clin Monit Comput* 2017; 31:693–699
97. Jacquet-Lagrèze M, Baudin F, David JS, et al.: End-tidal carbon dioxide variation after a 100- and a 500-ml fluid challenge to assess fluid responsiveness. *Ann Intensive Care* 2016; 6
98. Krige A, Bland M, Fanshawe T: Fluid responsiveness prediction using Vigileo FloTrac measured cardiac output changes during passive leg raise test. *J Intensive Care* 2016; 4
99. Myatra SN, Prabu NR, Divatia JV, et al.: The Changes in Pulse Pressure Variation or Stroke Volume Variation After a “Tidal Volume Challenge” Reliably Predict Fluid Responsiveness During Low Tidal Volume Ventilation. *Crit Care Med* 2017; 415–421
100. Yonis H, Bitker L, Aublanc M, et al.: Change in cardiac output during Trendelenburg maneuver is a reliable predictor of fluid responsiveness in patients with acute respiratory distress syndrome in the prone position under protective ventilation. *Crit Care* 2017; 21:1–12
101. Renner J, Gruenewald M, Hill M, et al.: Non-invasive assessment of fluid responsiveness using CNAP™ technology is interchangeable with invasive arterial measurements during major open abdominal surgery. *Br J Anaesth* 2017; 118:58–67
102. Min JJ, Lee J-H, Hong KY, et al.: Utility of stroke volume variation measured using non-invasive bioreactance as a predictor of fluid responsiveness in the prone position. *J Clin Monit Comput* 2017; 31:397–405
103. Biais M, Larghi M, Henriot J, et al.: End-Expiratory Occlusion Test Predicts Fluid Responsiveness in Patients With Protective Ventilation in the Operating Room. *Anesth Analg* 2017; 125:1889–1895

104. Biais M, de Courson H, Lanchon R, et al.: Mini-fluid Challenge of 100 ml of Crystalloid Predicts Fluid Responsiveness in the Operating Room. *Anesthesiology* 2017; 127:450–456
105. Messina A, Romano SM, Bonicolini E, et al.: Cardiac cycle efficiency and diastolic pressure variations: New parameters for fluid therapy: An observational study. *Eur J Anaesthesiol* 2017; 34:755–763
106. Lu N, Xi X, Jiang L, et al.: Exploring the best predictors of fluid responsiveness in patients with septic shock. *Am J Emerg Med* 2017; 35:1258–1261
107. el Hadouti Y, Valencia L, Becerra A, et al.: Echocardiography and passive leg raising in the postoperative period: A prospective observational study. *Eur J Anaesthesiol* 2017; 34:748–754
108. Jozwiak M, Depret F, Teboul JL, et al.: Predicting Fluid Responsiveness in Critically Ill Patients by Using Combined End-Expiratory and End-Inspiratory Occlusions With Echocardiography. *Crit Care Med* 2017; 45:e1131–e1138
109. Renner J, Gruenewald M, Hill M, et al.: Non-invasive assessment of fluid responsiveness using CNAP™ technology is interchangeable with invasive arterial measurements during major open abdominal surgery. *Br J Anaesth* 2017; 118:58–67
110. Xu J, Peng X, Pan C, et al.: Fluid responsiveness predicted by transcutaneous partial pressure of oxygen in patients with circulatory failure: a prospective study. *Ann Intensive Care* 2017; 7
111. Ma Guang, Hao Gwei, Yang Xmei, et al.: Internal jugular vein variability predicts fluid responsiveness in cardiac surgical patients with mechanical ventilation. *Ann Intensive Care* 2018; 8
112. Wu J, Wang Z, Wang T, et al.: Evaluation of the fluid responsiveness in patients with septic shock by ultrasound plus the passive leg raising test [Internet]. *Journal of Surgical Research* 2018; 224:207–214 Available from: <https://doi.org/10.1016/j.jss.2017.12.014>
113. Si X, Cao D-Y, Chen J, et al.: Effect of Systolic Cardiac Function on Passive Leg Raising for Predicting Fluid Responsiveness: A Prospective Observational Study. *Chin Med J (Engl)* 2018; 131:253–261
114. Georges D, de Courson H, Lanchon R, et al.: End-expiratory occlusion maneuver to predict fluid responsiveness in the intensive care unit: An echocardiographic study. *Crit Care* 2018; 22:1–8
115. Joosten A, Boudart C, Vincent J-L, et al.: Ability of a New Smartphone Pulse Pressure Variation and Cardiac Output Application to Predict Fluid Responsiveness in Patients Undergoing Cardiac Surgery. *Anesth Analg* 2019; 128:1145–1151
116. Ali A, Abdullah T, Sabanci PA, et al.: Comparison of ability of pulse pressure variation to predict fluid responsiveness in prone and supine position: an observational study. *J Clin Monit Comput* 2019; 33:573–580
117. He F, Li X, Thapa S, et al.: Evaluation of volume responsiveness by pulse pressure variability and inferior vena cava collapsibility index at different tidal volumes by mechanical ventilation. *Brazilian journal of medical and biological research* 2019; 52:e8827

118. Ali A, Dorman Y, Abdullah T, et al.: Ability of mini-fluid challenge to predict fluid responsiveness in obese patients undergoing surgery in the prone position. *Minerva Anesthesiol* 2019; 85:981–988
119. Xu L-Y, Tu G-W, Cang J, et al.: End-expiratory occlusion test predicts fluid responsiveness in cardiac surgical patients in the operating theatre. *Ann Transl Med* 2019; 7
120. Trifi A, Abdellatif S, Daly F, et al.: Ultrasound stroke volume variation induced by passive leg raising and fluid responsiveness: An observational cohort study. *Med Intensiva* 2019; 43:10–17
121. Beurton A, Teboul J-LL, Giroto V, et al.: Intra-Abdominal Hypertension Is Responsible for False Negatives to the Passive Leg Raising Test. *Crit Care Med* 2019; 47:E639–E647
122. Dépret F, Jozwiak M, Teboul J-LJL, et al.: Esophageal Doppler Can Predict Fluid Responsiveness Through End-Expiratory and End-Inspiratory Occlusion Tests [Internet]. *Crit Care Med* 2019; 47:e96–e102 Available from: <https://www.embase.com/search/results?subaction=viewrecord&id=L625988583&from=export>
123. Messina A, Montagnini C, Cammarota G, et al.: Tidal volume challenge to predict fluid responsiveness in the operating room: An observational study. *Eur J Anaesthesiol* 2019; 36:583–591
124. Fot E v., Izotova NN, Smetkin AA, et al.: Dynamic Tests to Predict Fluid Responsiveness After Off-Pump Coronary Artery Bypass Grafting. *J Cardiothorac Vasc Anesth* 2020; 34:926–931
125. Beurton A, Teboul JL, Gavelli F, et al.: The effects of passive leg raising may be detected by the plethysmographic oxygen saturation signal in critically ill patients. *Crit Care* 2019; 23
126. Jun JH, Chung RK, Baik HJ, et al.: The tidal volume challenge improves the reliability of dynamic preload indices during robot-assisted laparoscopic surgery in the Trendelenburg position with lung-protective ventilation. *BMC Anesthesiol* 2019; 19
127. Lee C-T, Lee T, Chiu C-T, et al.: Mini- fluid challenge test predicts stroke volume and arterial pressure fluid responsiveness during spine surgery in prone position. *Medicine* 2020; 99:e19031
128. Wang J, Zhou D, Gao Y, et al.: Effect of VTILVOT variation rate on the assessment of fluid responsiveness in septic shock patients. *Medicine* 2020; 99:e22702
129. Baptiste L, Carrillon R, Javelier S, et al.: Pulse Pressure Variations and Plethysmographic Variability Index Measured at Ear Are Able to Predict Fluid Responsiveness in the Sitting Position for Neurosurgery. *J Neurosurg Anesthesiol* 2020; 32:263–267
130. Bubenek-Turconi Ş-I, HENDY A, Băilă S, et al.: The value of a superior vena cava collapsibility index measured with a miniaturized transoesophageal monoplane continuous echocardiography probe to predict fluid responsiveness compared to stroke volume variations in open major vascular surgery: a prospe. *J Clin Monit Comput* 2020; 34:491–499

131. Hou J-Y, Zheng J-L, Ma G-G, et al.: Evaluation of radial artery pulse pressure effects on detection of stroke volume changes after volume loading maneuvers in cardiac surgical patients. *Ann Transl Med* 2020; 8
132. Weil G, Motamed C, Monnet X, et al.: End-Expiratory Occlusion Test to Predict Fluid Responsiveness Is Not Suitable for Laparotomic Surgery. *Anesth Analg* 2020; 130:151–158
133. Messina A, Montagnini C, Cammarota G, et al.: Assessment of fluid responsiveness in prone neurosurgical patients undergoing protective ventilation: Role of dynamic indices, tidal volume challenge, and end-expiratory occlusion test. *Anesth Analg* 2020; 752–761
134. Hamzaoui O, Shi R, Carelli S, et al.: Changes in pulse pressure variation to assess preload responsiveness in mechanically ventilated patients with spontaneous breathing activity: an observational study. *Br J Anaesth* 2021; 127:532–538
135. Giraud R, Vujovic B, Assouline B, et al.: Do ScvO<sub>2</sub> variations induced by passive leg raising predict fluid responsiveness? A prospective study. *Physiol Rep* 2021; 9
136. Kaur K, Nakra M, Mangal V, et al.: Comparative evaluation of stroke volume variation and inferior vena cava distensibility index for prediction of fluid responsiveness in mechanically ventilated patients. *Ann Card Anaesth* 2021; 24:327–332
137. Bataille B, de Selle J, Moussot P-E, et al.: Machine learning methods to improve bedside fluid responsiveness prediction in severe sepsis or septic shock: an observational study. *Br J Anaesth* 2021; 126:826–834
138. Lizuka Y, Sanui M, Otsuka Y, et al.: Changes in peripheral perfusion index during intraoperative end-expiratory occlusion tests do not predict the response to fluid administration in patients undergoing lung protective ventilation. *J Anesth* 2021; 35:837–843
139. Messina A, Lionetti G, Foti L, et al.: Mini fluid challenge and End-expiratory occlusion test to assess fluid responsiveness in the operating room (MANEUVER study): A multicentre cohort study. *Eur J Anaesthesiol* 2021; 38:422–431
140. Watanabe R, Suehiro K, Mukai A, et al.: Changes in stroke volume induced by lung recruitment maneuver can predict fluid responsiveness during intraoperative lung-protective ventilation in prone position. *BMC Anesthesiol* 2021; 21
141. Chen Y-H, Lai Y-J, Huang C-Y, et al.: Effects of positive end-expiratory pressure on the predictability of fluid responsiveness in acute respiratory distress syndrome patients. *Sci Rep* 2021; 11:10186
142. Taccheri T, Gavelli F, Teboul JL, et al.: Do changes in pulse pressure variation and inferior vena cava distensibility during passive leg raising and tidal volume challenge detect preload responsiveness in case of low tidal volume ventilation? *Crit Care* 2021; 25
143. Elsayed AI, Selim KAW, Zaghla HE, et al.: Comparison of changes in PPV using a tidal volume challenge with a passive leg raising test to predict fluid responsiveness in patients ventilated using low tidal volume. *Indian Journal of Critical Care Medicine* 2021; 25:685–689

144. Shi R, Moretto F, Prat D, et al.: Dynamic changes of pulse pressure but not of pulse pressure variation during passive leg raising predict preload responsiveness in critically ill patients with spontaneous breathing activity. *J Crit Care* 2022; 72
145. Shi R, Ayed S, Moretto F, et al.: Tidal volume challenge to predict preload responsiveness in patients with acute respiratory distress syndrome under prone position. *Crit Care* 2022; 26
146. Abdullah T, Ali A, Saka E, et al.: Ability of short-time low peep challenge to predict fluid responsiveness in mechanically ventilated patients in the intensive care. *J Clin Monit Comput* 2022; 36:1165–1172
147. Xu Y, Guo J, Wu Q, et al.: Efficacy of using tidal volume challenge to improve the reliability of pulse pressure variation reduced in low tidal volume ventilated critically ill patients with decreased respiratory system compliance. *BMC Anesthesiol* 2022; 22
148. Mallat J, Fischer MO, Granier M, et al.: Passive leg raising-induced changes in pulse pressure variation to assess fluid responsiveness in mechanically ventilated patients: a multicentre prospective observational study. *Br J Anaesth* 2022; 129:308–316
149. Salem YSM, Botros JM, Khalil M, et al.: Effects of tidal volume challenge on the reliability of plethysmography variability index in hepatobiliary and pancreatic surgeries: a prospective interventional study. *Preprint* 2022;
